# Supplementary material
Source: PubMed Central journal article supplement (PMC7275914)

## Supporting Information for

### Synthesis of a Pseudodisaccharide Suitable for Synthesis of Ring I Modified 4,5-2-Deoxystreptamine Type Aminoglycoside Antibiotics.

**Amr Sonousi,<sup>a,±</sup> Andrea Vasella,<sup>b</sup> and David Crich.<sup>a,c,d,e,\*</sup>**

- a) Department of Chemistry, Wayne State University, 5101 Cass Avenue, Detroit, MI 48202, USA
- b) Organic Chemistry Laboratory, ETH Zürich, Vladimir-Prelog-Weg 1-5/10, 8093 Zürich, Switzerland
- c) Department of Pharmaceutical and Biomedical Sciences, University of Georgia, 250 West Green Street, Athens, GA 30602, USA
- d) Department of Chemistry, University of Georgia, 140 Cedar Street, Athens, GA 30602, USA,
- e) Complex Carbohydrate Research Center, University of Georgia, 315 Riverbend Road, Athens, GA 30602, USA

Email: [David.crich@uga.edu](mailto:David.crich@uga.edu)

## Table of Contents

| Compound                                                                                                                                                                                                                                                                                                     | Page     |
|--------------------------------------------------------------------------------------------------------------------------------------------------------------------------------------------------------------------------------------------------------------------------------------------------------------|----------|
| (1 <i>R</i> ,3 <i>S</i> ,4 <i>R</i> ,5 <i>S</i> ,6 <i>R</i> )-1,3-Diazido-1,3-dideamino-5- <i>O</i> -[2',5'-dibenzyl-3'- <i>O</i> -(2'',6''-diazido-2'',6''-dideamino-3'',4''-di- <i>O</i> -benzyl- $\alpha$ -L-idopyranosyl)- $\beta$ -D-ribofuranosyl]-6- <i>O</i> -benzyl-2-deoxystreptamine ( <b>3</b> ) | S3 – S10 |
| Octyl 6- <i>O</i> -acetyl-3,4-dideoxy- $\alpha$ -D-glycero-hex-3-enopyranosid-2-ulose ( <b>7</b> )                                                                                                                                                                                                           | S7-S10   |
| Octyl 3,4-dideoxy- $\alpha$ -D-erythro-hexopyranoside ( <b>8</b> )                                                                                                                                                                                                                                           | S11-S14  |
| Octyl 3,4-dideoxy-6- <i>O</i> -trisyl- $\alpha$ -D-erythro-hexopyranoside ( <b>9</b> )                                                                                                                                                                                                                       | S15-S18  |
| Octyl 2- <i>O</i> -benzyl-3,4-dideoxy-6- <i>O</i> -trisyl- $\alpha$ -D-erythro-hexopyranoside ( <b>10</b> )                                                                                                                                                                                                  | S19-S22  |
| 2- <i>O</i> -Benzyl-3,4-dideoxy-6- <i>O</i> -trisyl- $\alpha,\beta$ -D-erythro-hexopyranose ( <b>11</b> )                                                                                                                                                                                                    | S23-S26  |
| 1,3,2''',6'''-Tetraazido-6,2'',5'',3''',4'''-penta- <i>O</i> -benzyl-1,3,2',2''',6'''-pentadeamino-2'-benzyloxy-3',4'-dideoxy-6'- <i>O</i> -trisyl paromomycin ( <b>12</b> )                                                                                                                                 | S27-S30  |

**<sup>1</sup>H NMR (400 MHz, CDCl<sub>3</sub>) of (1*R*,3*S*,4*R*,5*S*,6*R*)-1,3-Diazido-1,3-dideamino-5-*O*-[2',5'-dibenzyl-3'-*O*-(2'',6''-diazido-2'',6''-dideamino-3'',4''-di-*O*-benzyl- $\alpha$ -L-idopyranosyl)- $\beta$ -D-ribofuranosyl]-6-*O*-benzyl-2- deoxystreptamine (3)**

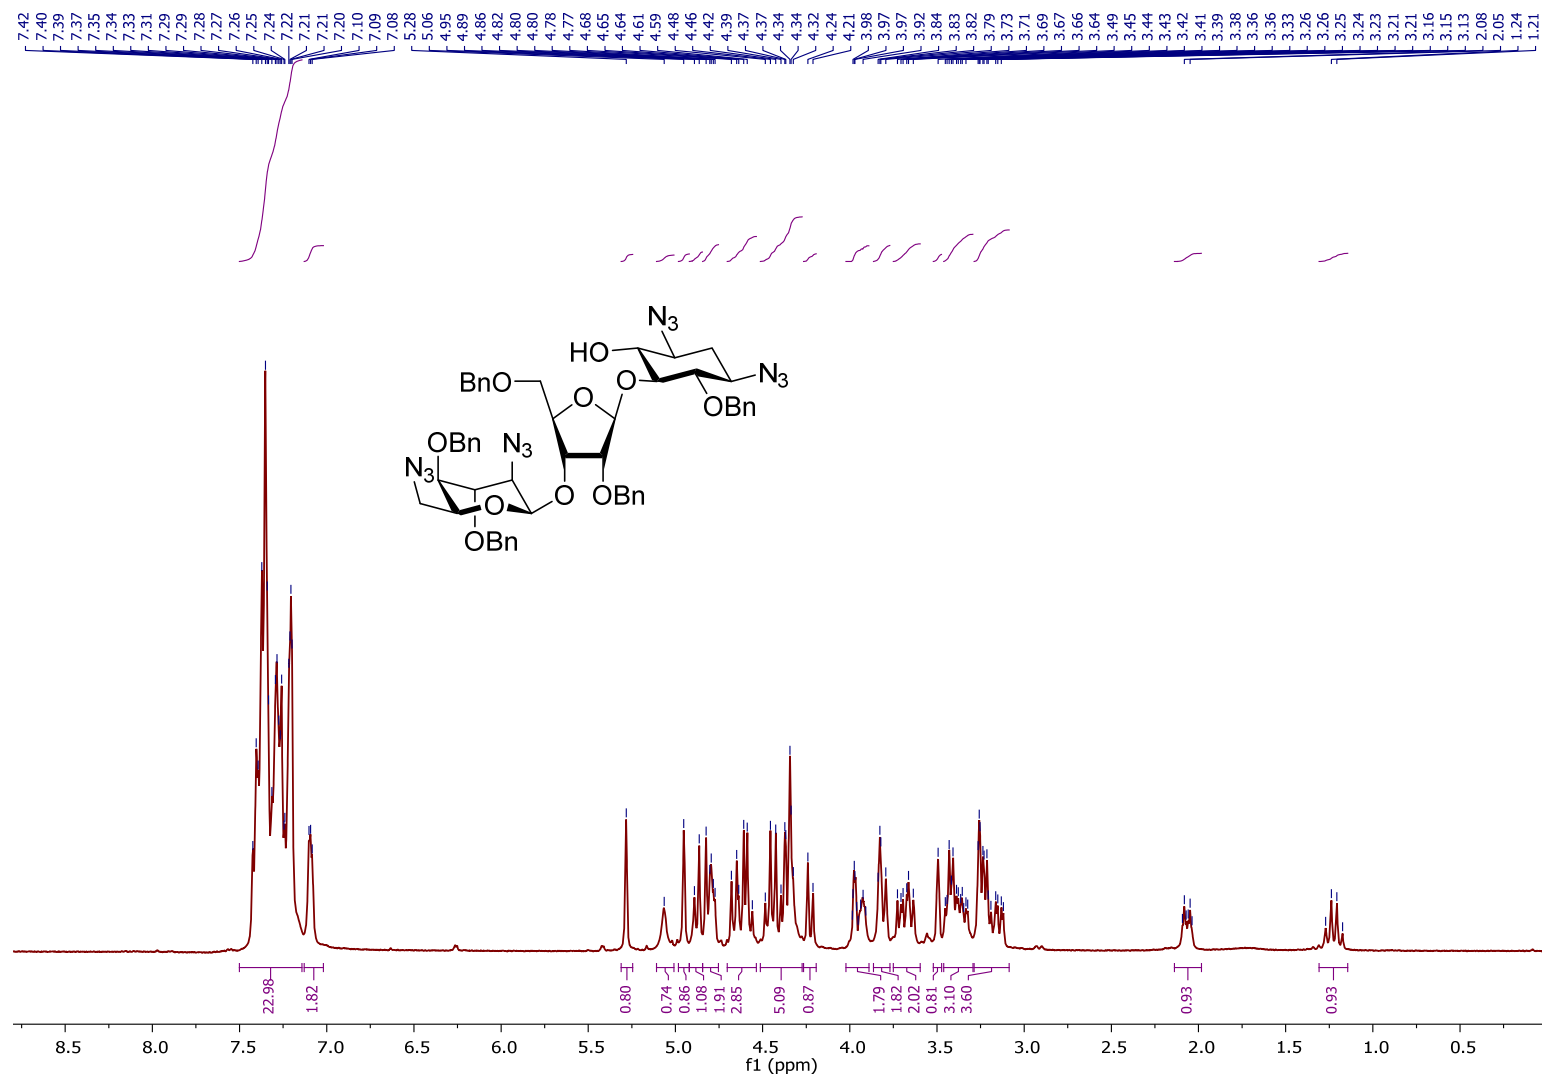

$^{13}\text{C}\{^1\text{H}\}$  NMR (100 MHz,  $\text{CDCl}_3$ ) of (1*R*,3*S*,4*R*,5*S*,6*R*)-1,3-Diazido-1,3-dideamino-5-*O*-[2',5'-dibenzyl-3'-*O*-(2'',6''-diazido-2'',6''-dideamino-3'',4''-di-*O*-benzyl- $\alpha$ -L-idopyranosyl)- $\beta$ -D-ribofuranosyl]-6-*O*-benzyl-2-deoxystreptamine (3)

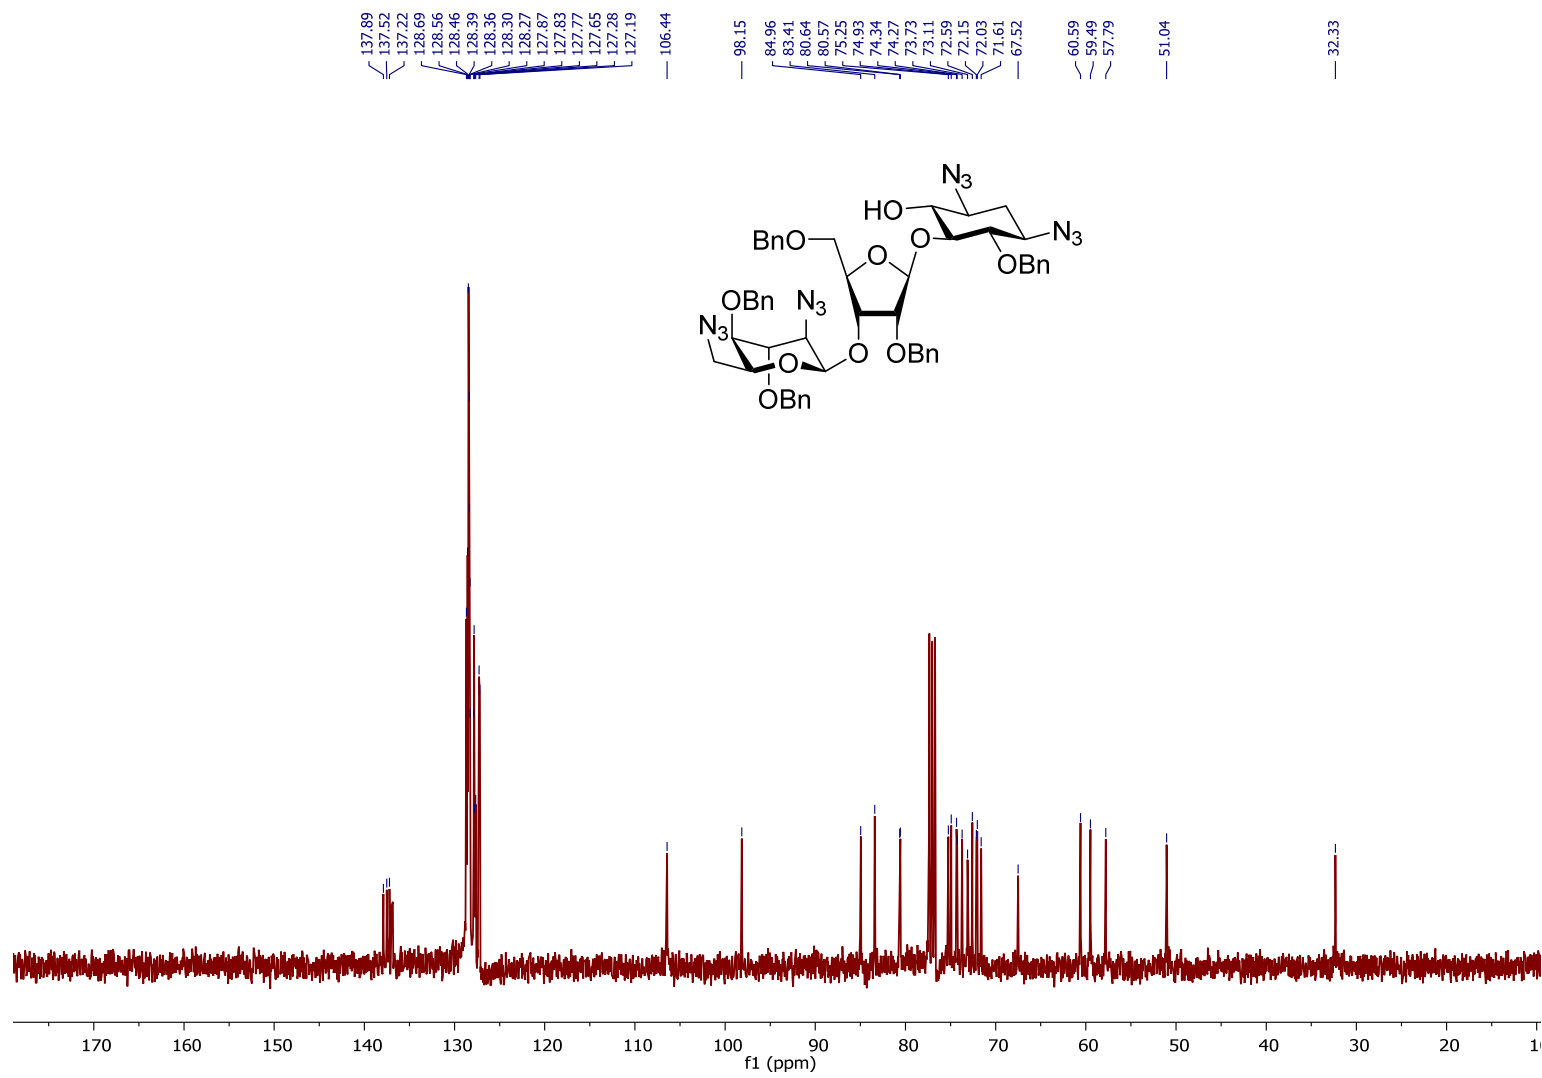

COSY spectrum (CDCl<sub>3</sub>) of (1*R*,3*S*,4*R*,5*S*,6*R*)-1,3-Diazido-1,3-dideamino-5-*O*-[2',5'-dibenzyl-3'-*O*-(2'',6''-diazido-2'',6''-dideamino-3'',4''-di-*O*-benzyl- $\alpha$ -L-idopyranosyl)- $\beta$ -D-ribofuranosyl]-6-*O*-benzyl-2- deoxystreptamine (3)

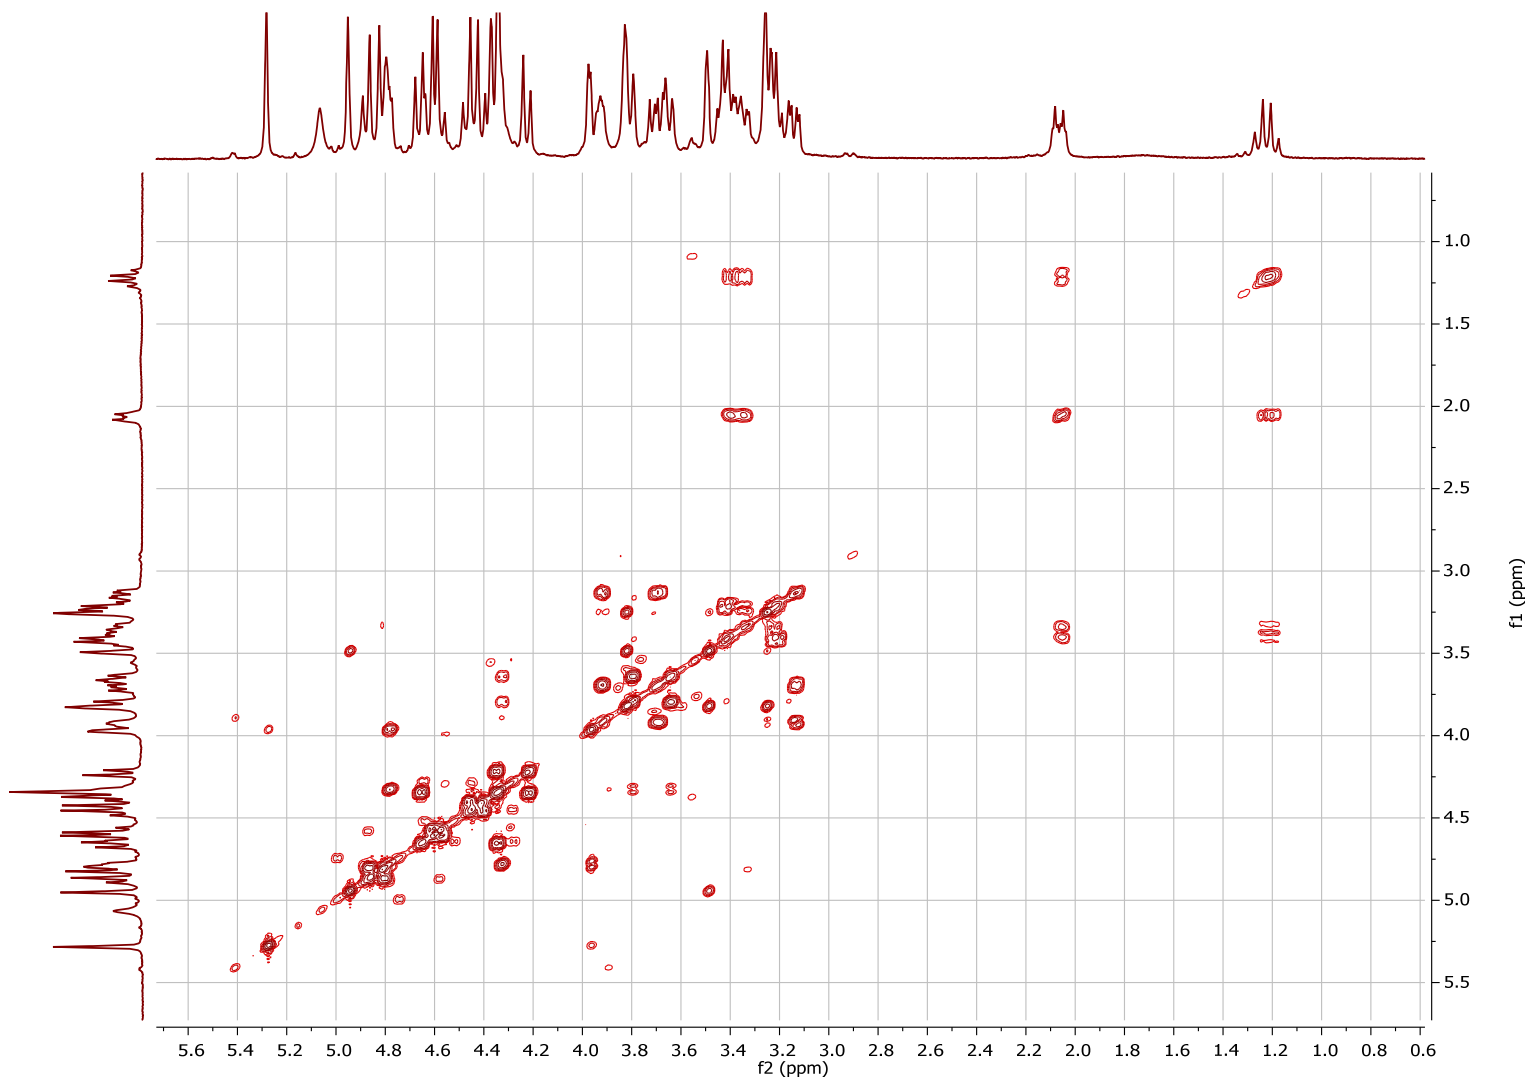

HSQC spectrum (CDCl<sub>3</sub>) of (1*R*,3*S*,4*R*,5*S*,6*R*)-1,3-Diazido-1,3-dideamino-5-*O*-[2',5'-dibenzyl-3'-*O*-(2'',6''-diazido-2'',6''-dideamino-3'',4''-di-*O*-benzyl- $\alpha$ -L-idopyranosyl)- $\beta$ -D-ribofuranosyl]-6-*O*-benzyl-2- deoxystreptamine (3)

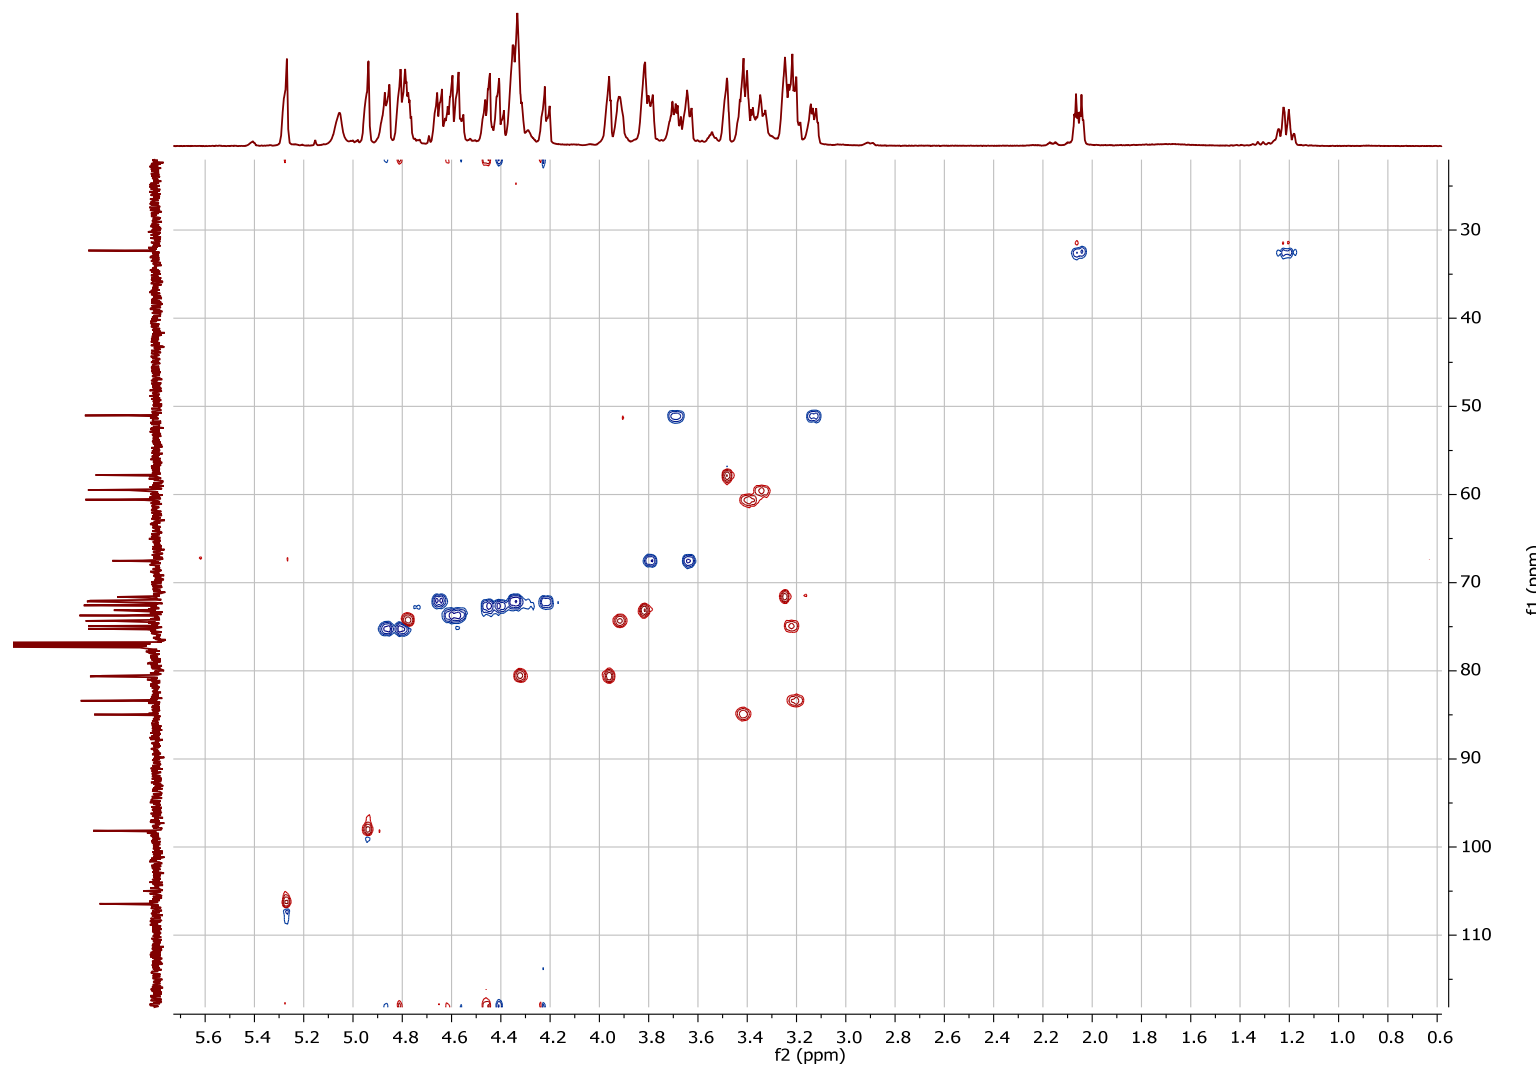

**<sup>1</sup>H NMR (400 MHz, CDCl<sub>3</sub>) of Octyl 6-*O*-acetyl-3,4-dideoxy- $\alpha$ -D-glycero-hex-3-enopyranosid-2-ulose (7)**

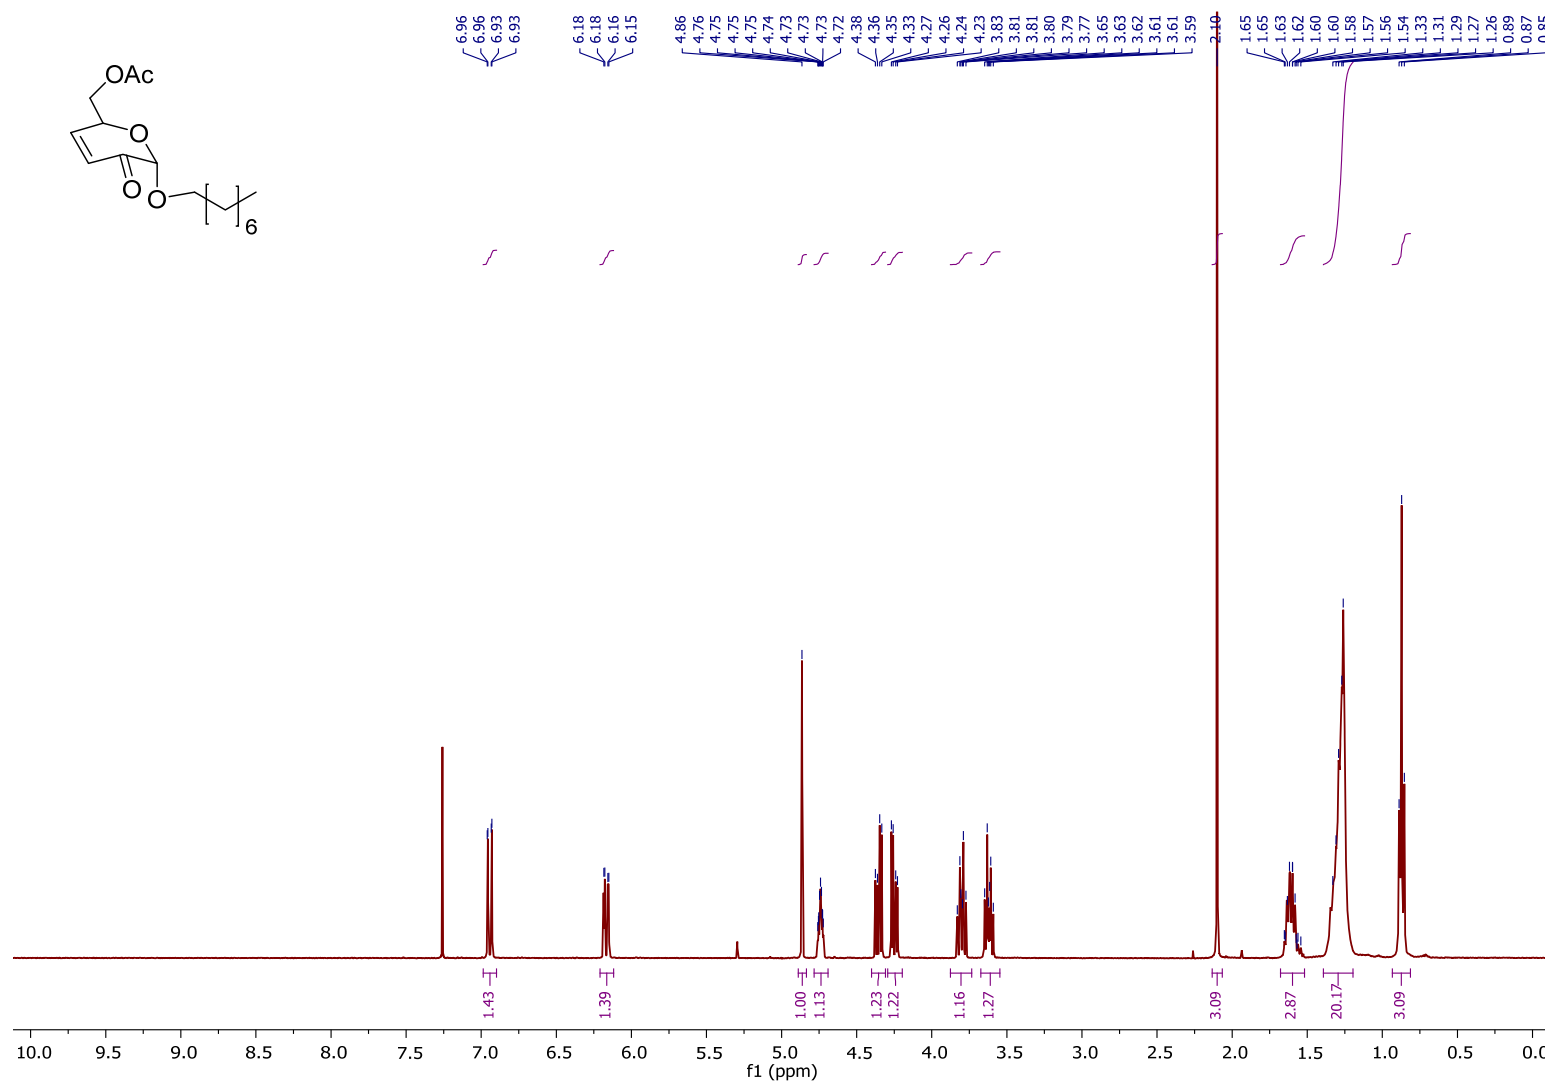

**$^{13}\text{C}\{^1\text{H}\}$  NMR (100 MHz,  $\text{CDCl}_3$ ) of Octyl 6-*O*-acetyl-3,4-dideoxy- $\alpha$ -D-glycero-hex-3-enopyranosid-2-ulose (7)**

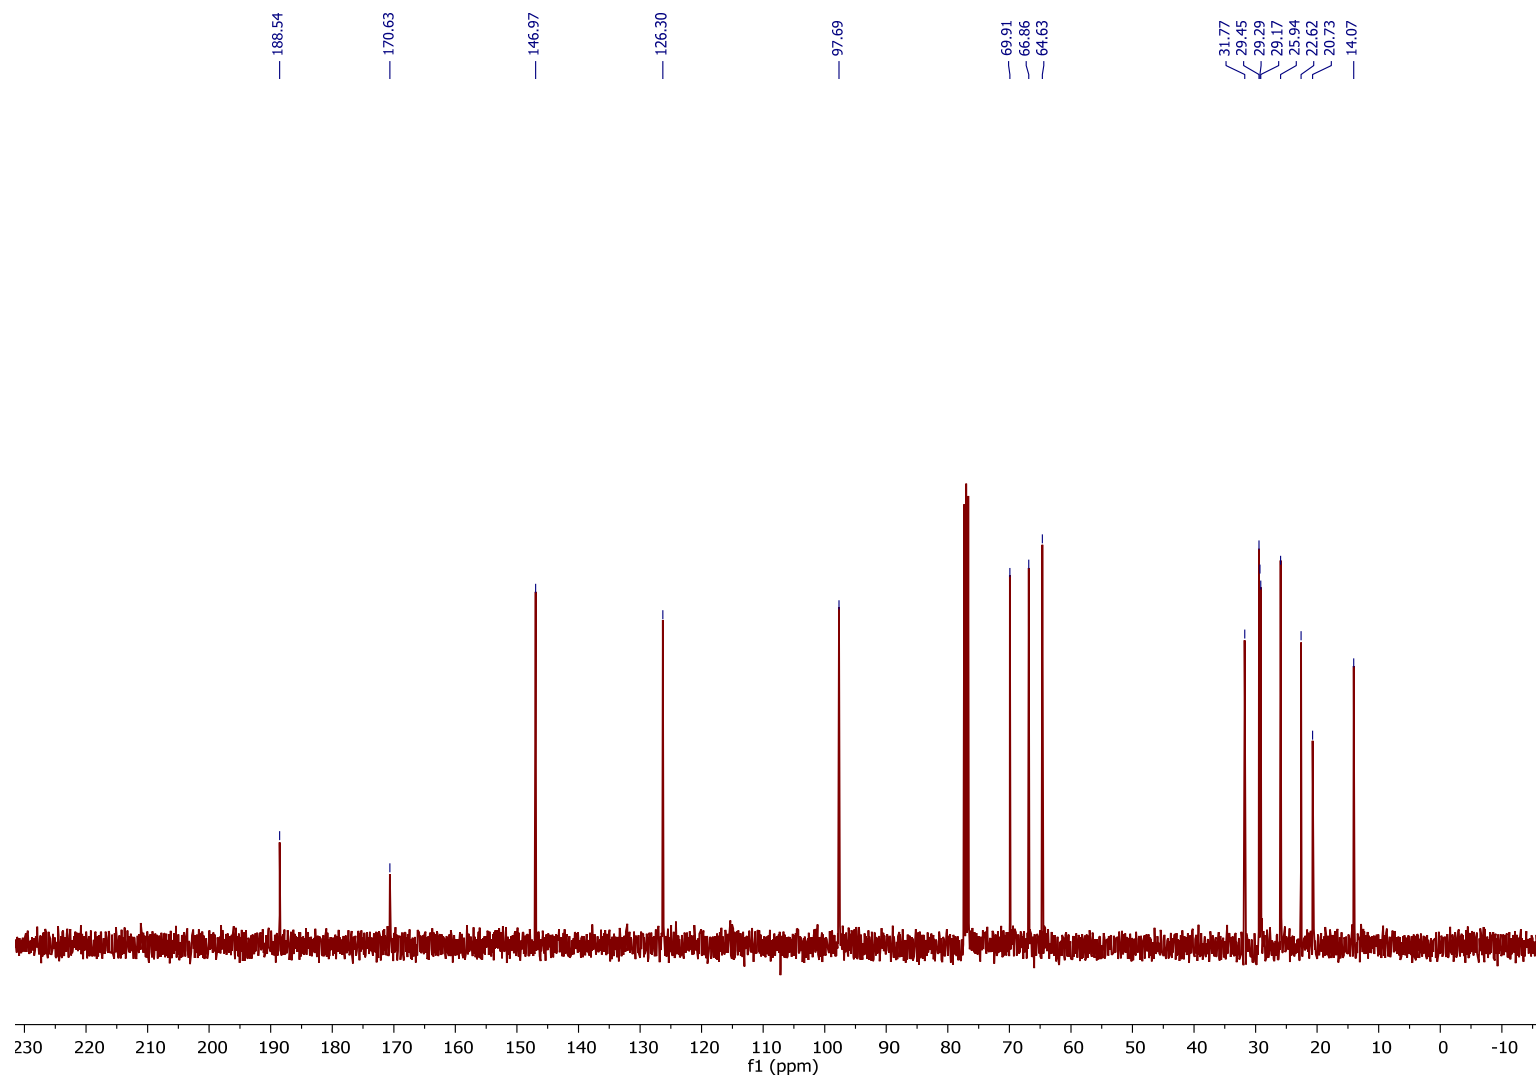



COSY spectrum (CDCl<sub>3</sub>) of Octyl 6-*O*-acetyl-3,4-dideoxy- $\alpha$ -D-glycero-hex-3-enopyranosid-2-ulose (7)

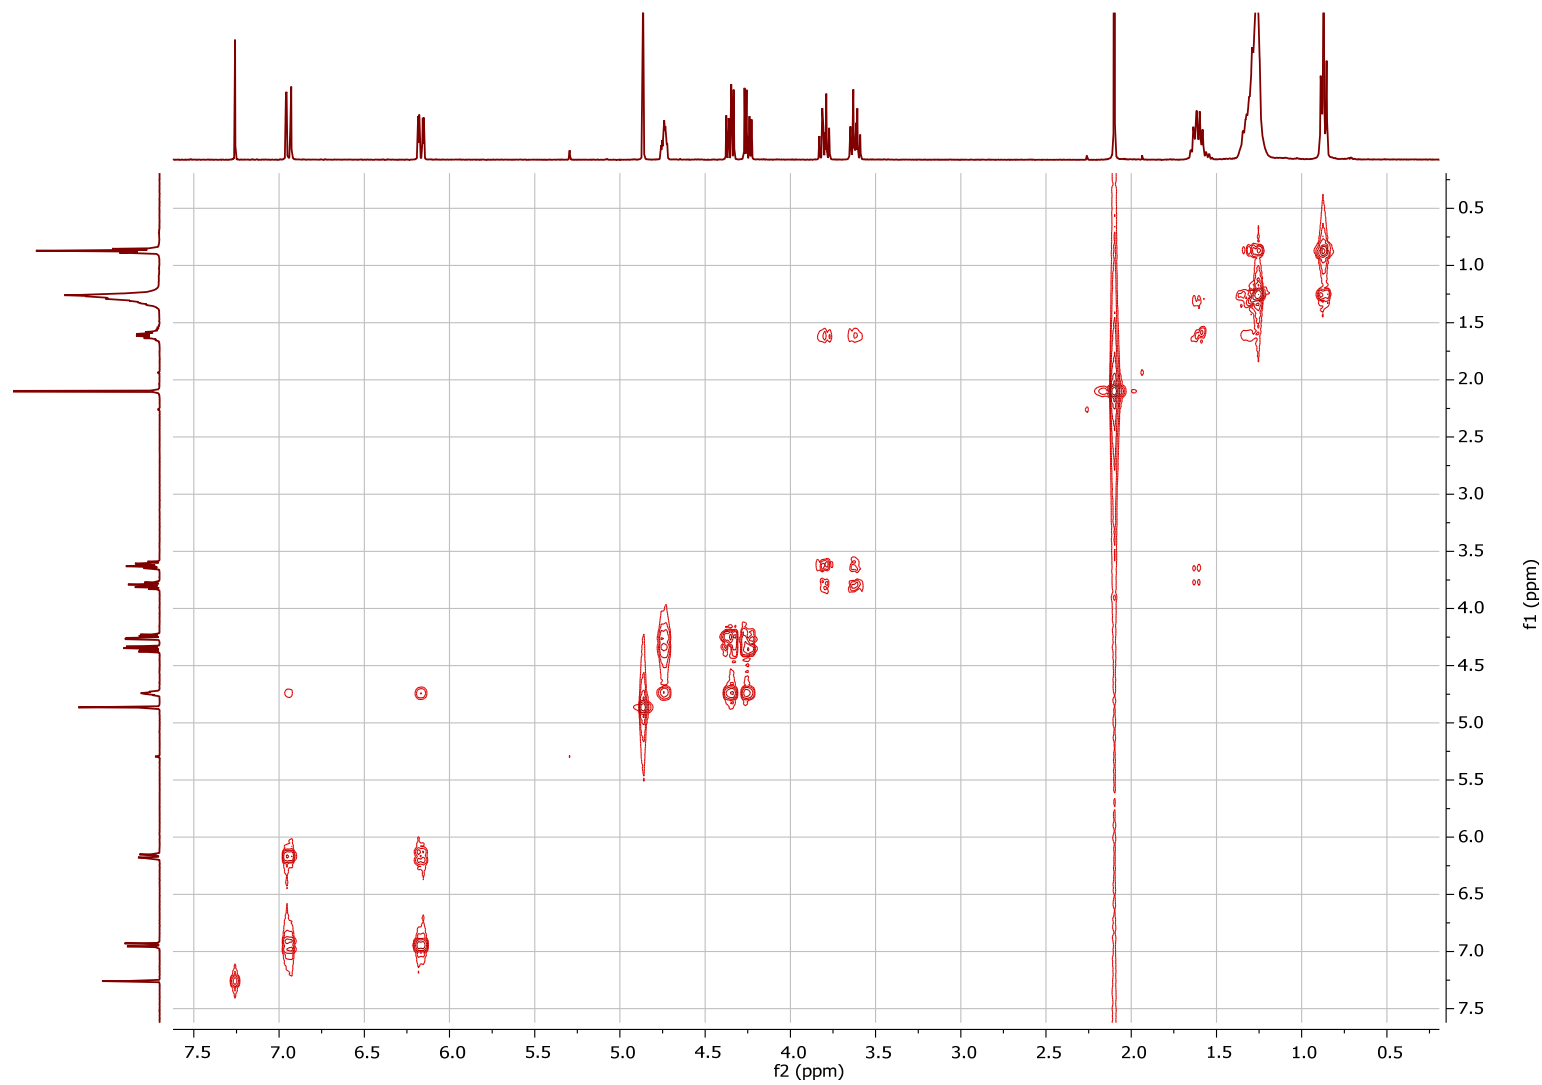

HSQC spectrum (CDCl<sub>3</sub>) of Octyl 6-*O*-acetyl-3,4-dideoxy- $\alpha$ -D-glycero-hex-3-enopyranosid-2-ulose (7)

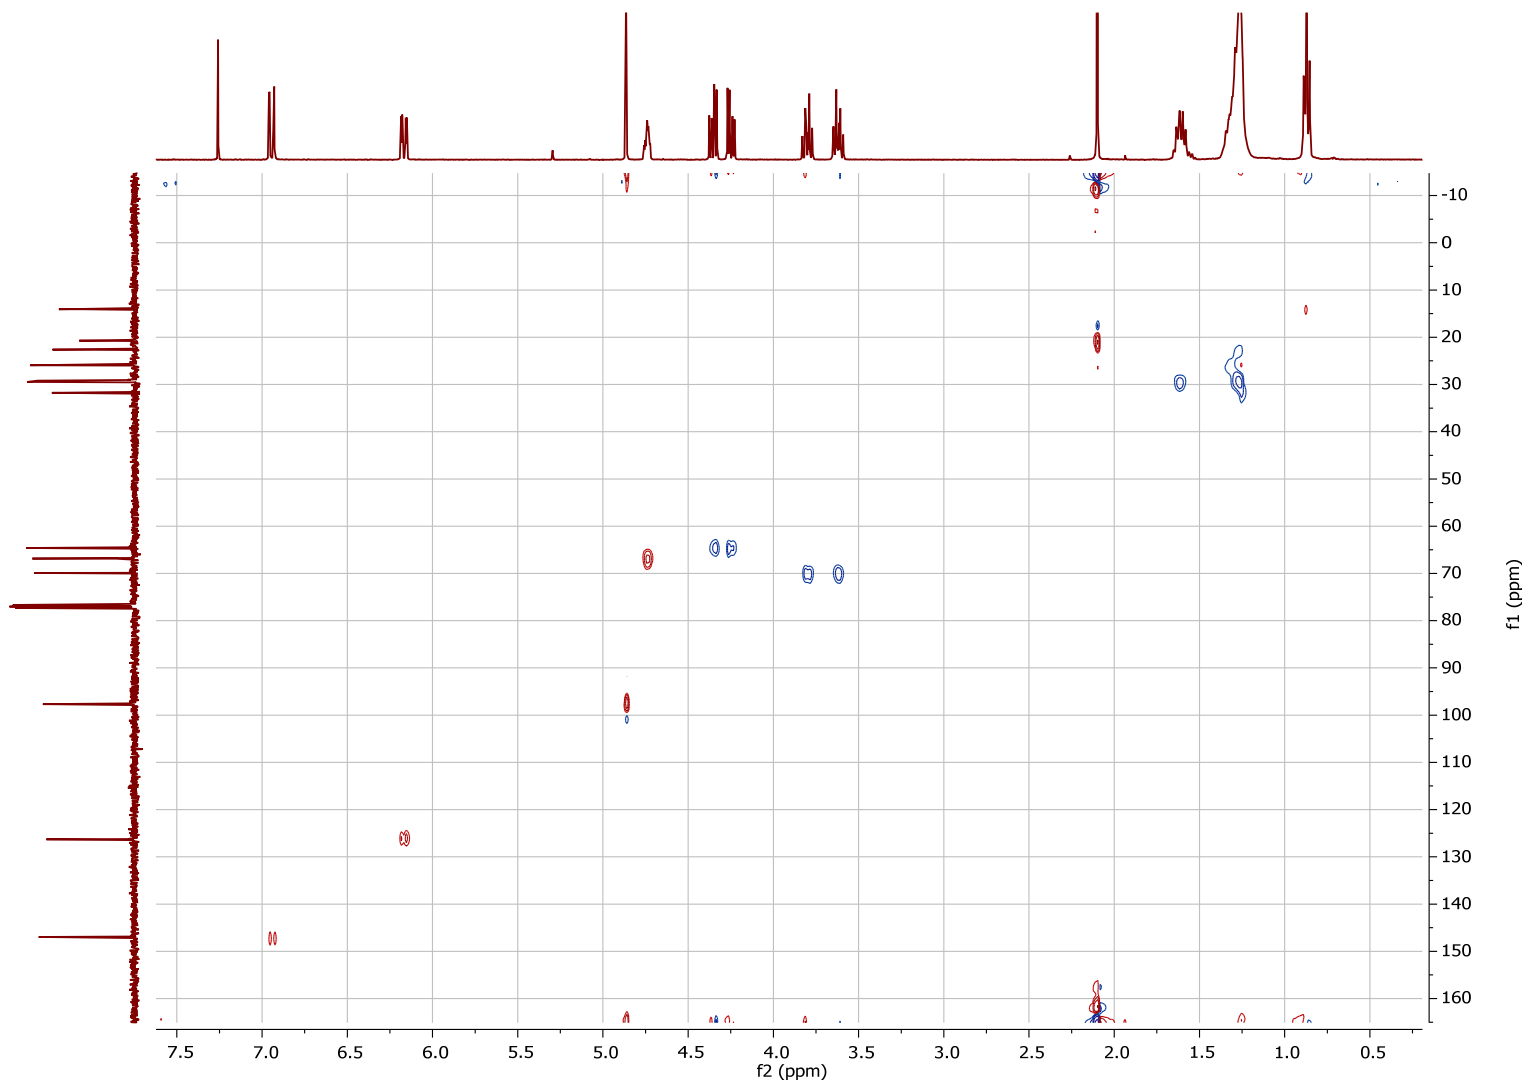

**<sup>1</sup>H NMR (400 MHz, CDCl<sub>3</sub>) of Octyl 3,4-dideoxy- $\alpha$ -D-erythro-hexopyranoside (8)**

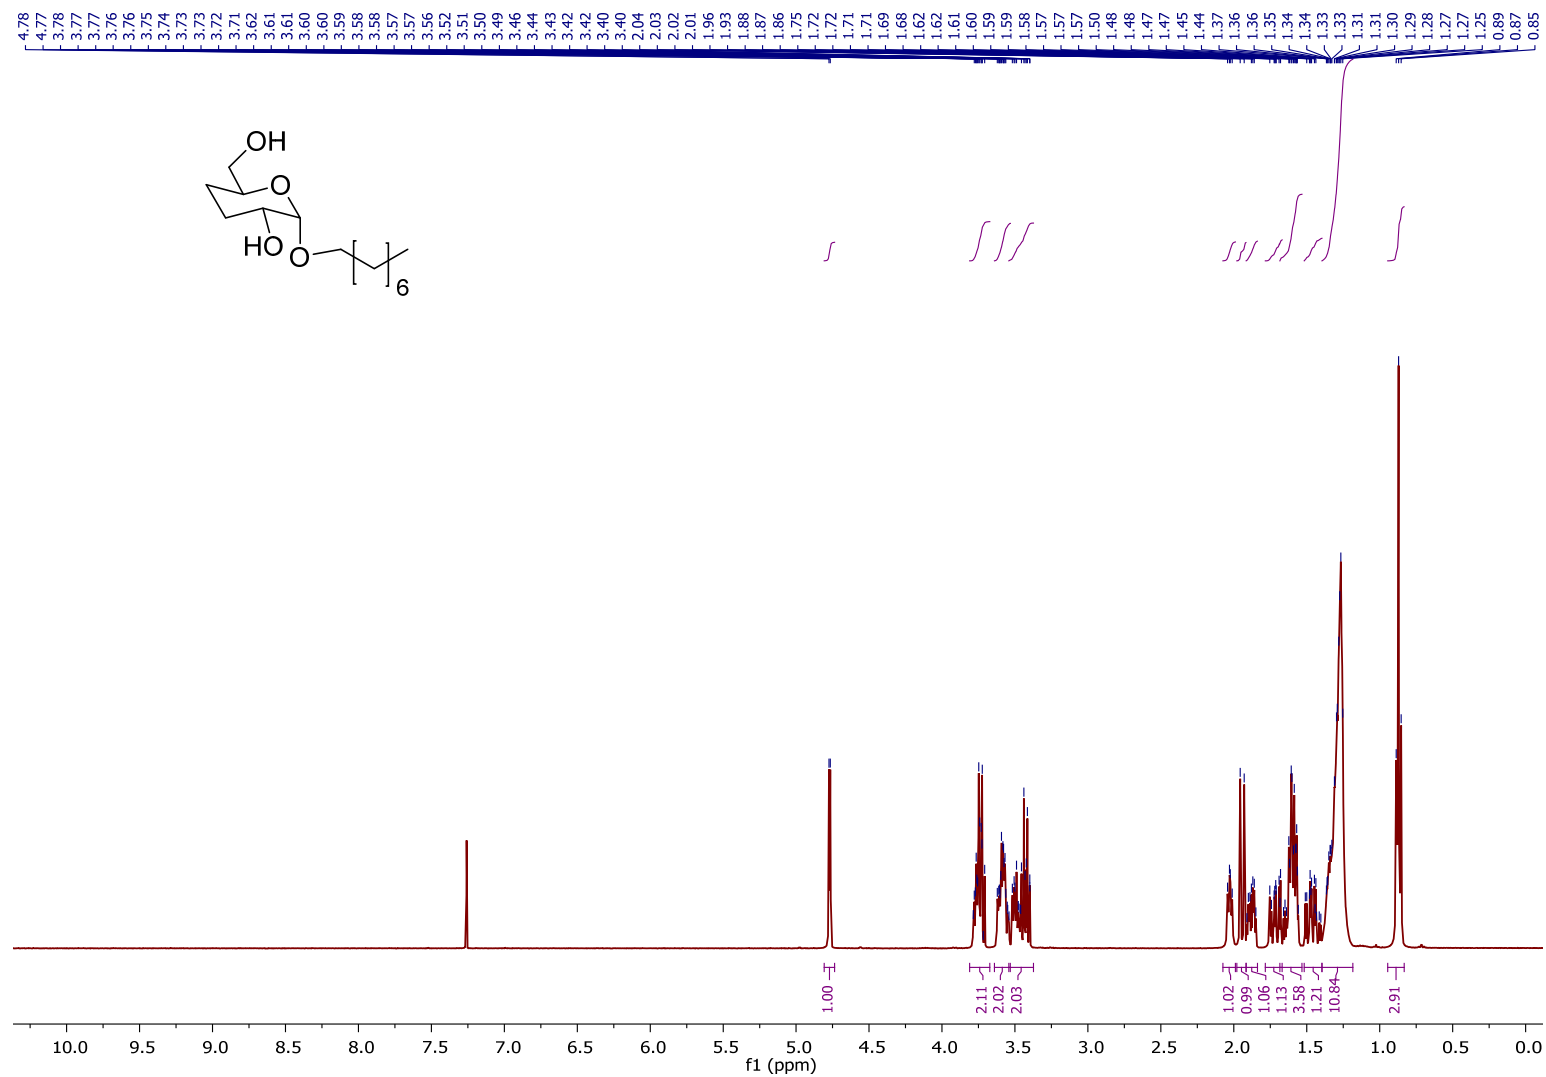

**$^{13}\text{C}\{^1\text{H}\}$  NMR (100 MHz,  $\text{CDCl}_3$ ) of Octyl 3,4-dideoxy- $\alpha$ -D-erythro-hexopyranoside (8)**

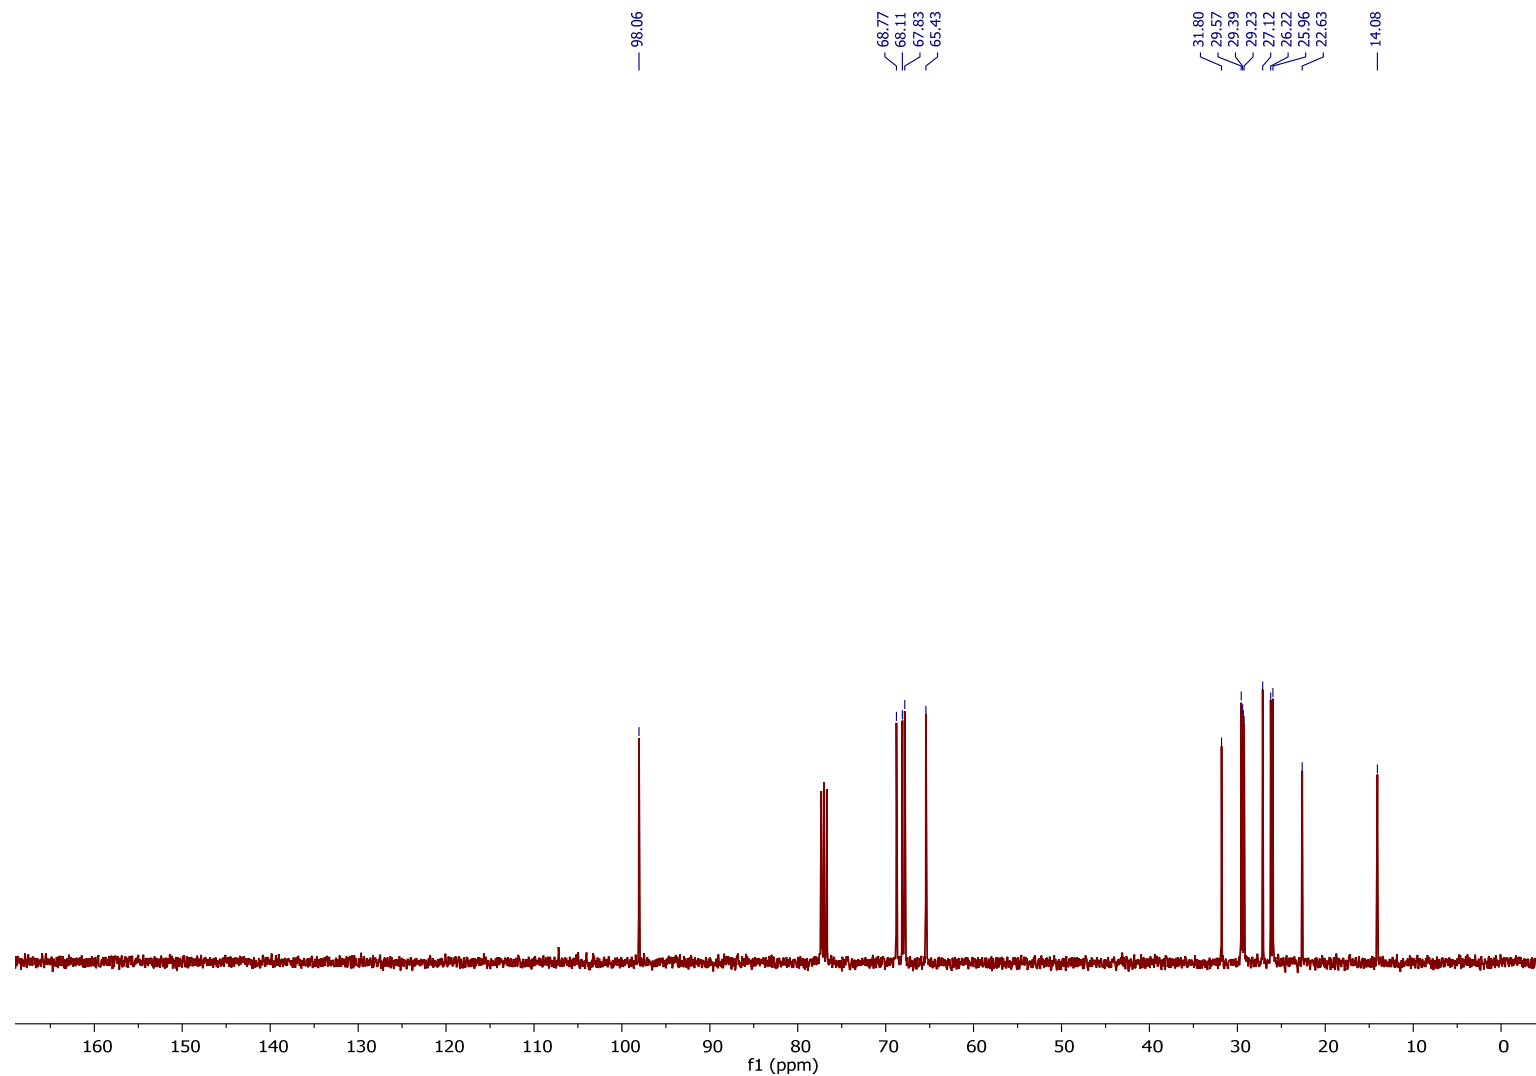

COSY spectrum (CDCl<sub>3</sub>) of Octyl 3,4-dideoxy- $\alpha$ -D-erythro-hexopyranoside (8)

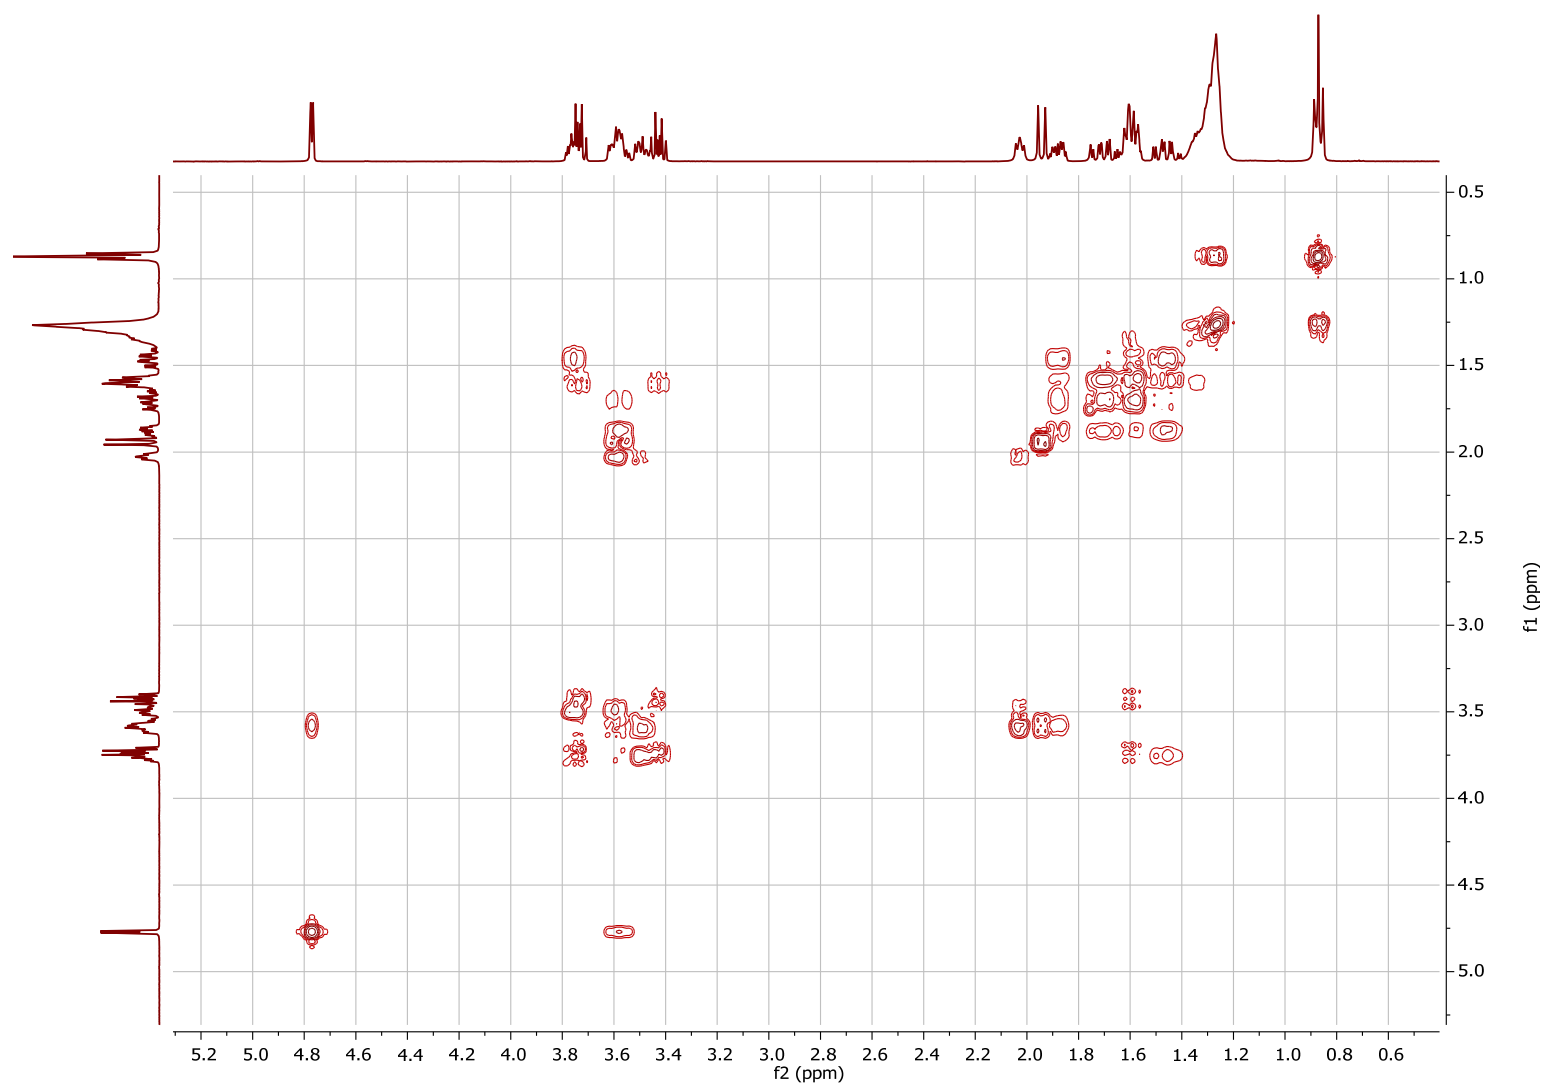

HSQC spectrum (CDCl<sub>3</sub>) of Octyl 3,4-dideoxy- $\alpha$ -D-erythro-hexopyranoside (8)

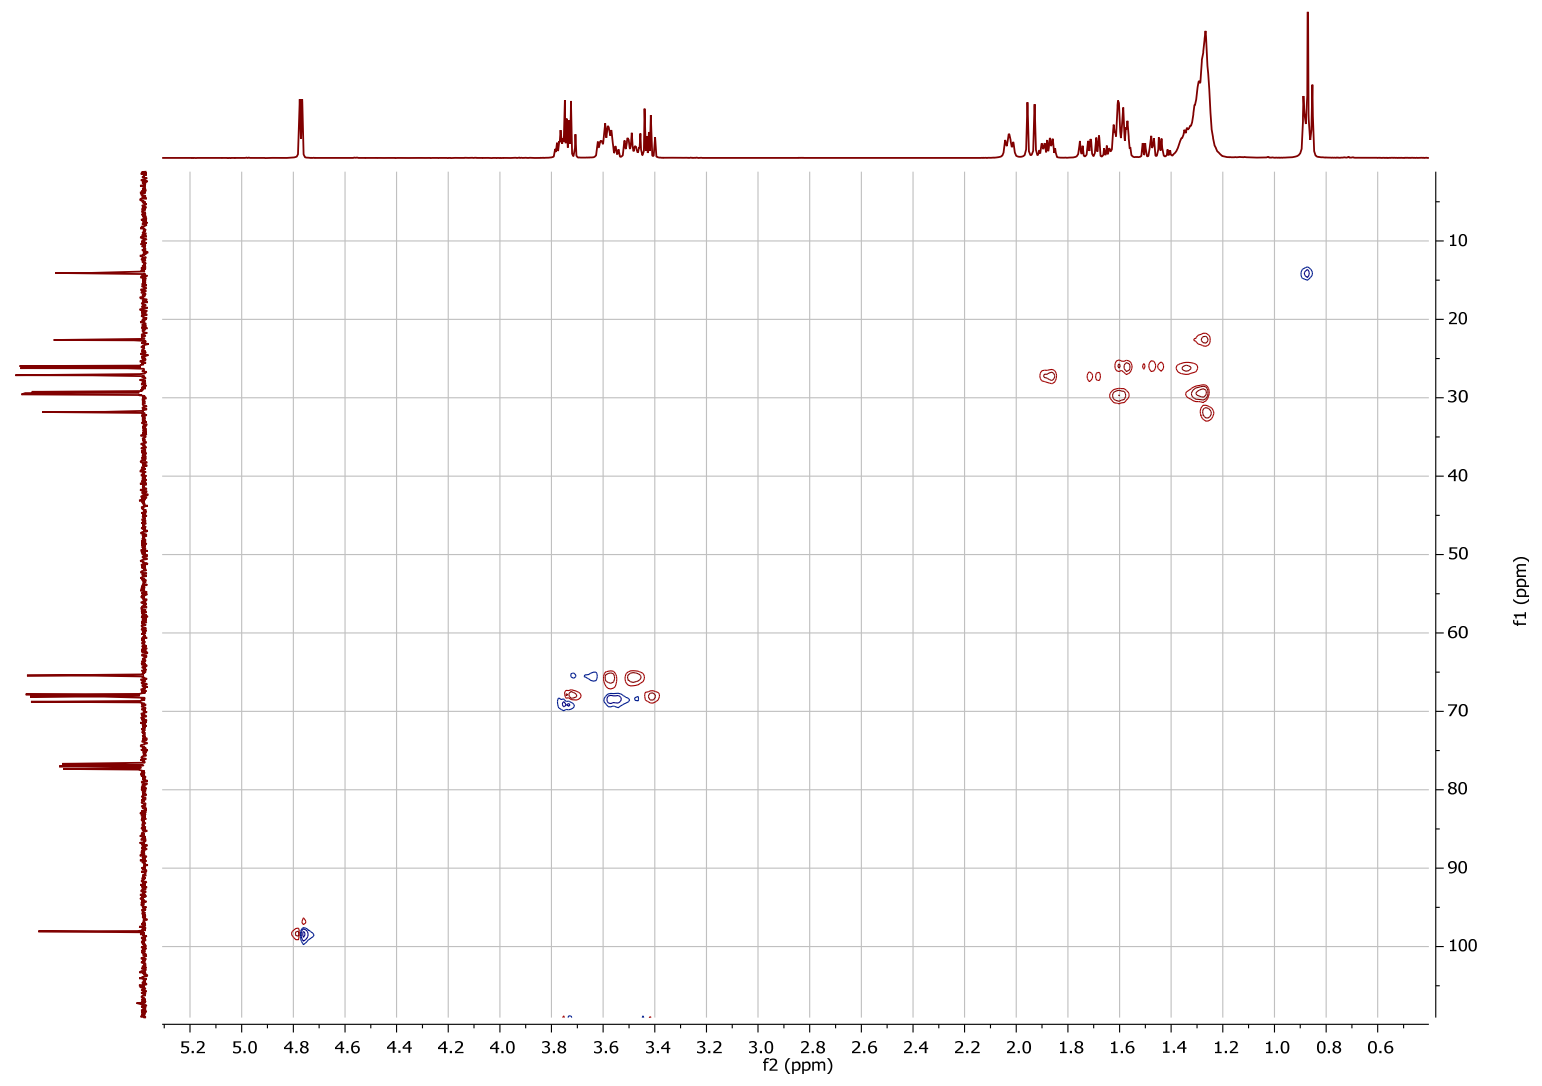



**$^{13}\text{C}\{^1\text{H}\}$  NMR (100 MHz,  $\text{CDCl}_3$ ) of Octyl 3,4-dideoxy-6-*O*-trisyl- $\alpha$ -D-erythro-hexopyranoside (9)**

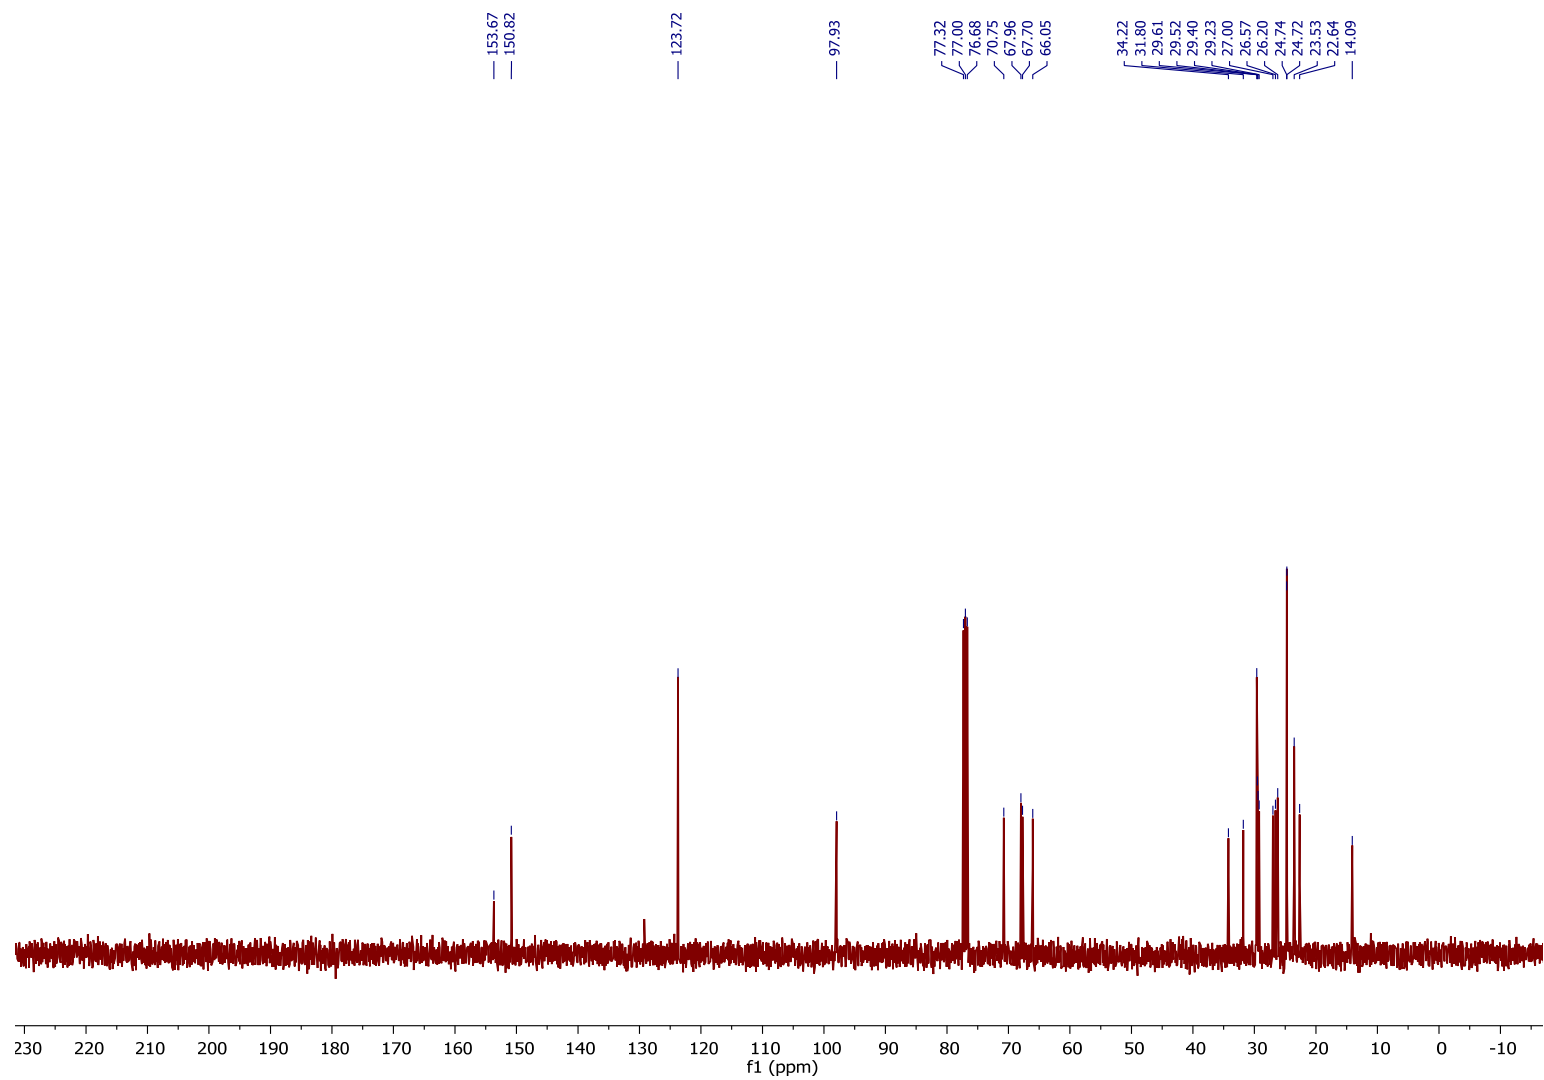



COSY spectrum (CDCl<sub>3</sub>) of Octyl 3,4-dideoxy-6-*O*-trisyl- $\alpha$ -D-erythro-hexopyranoside (9)

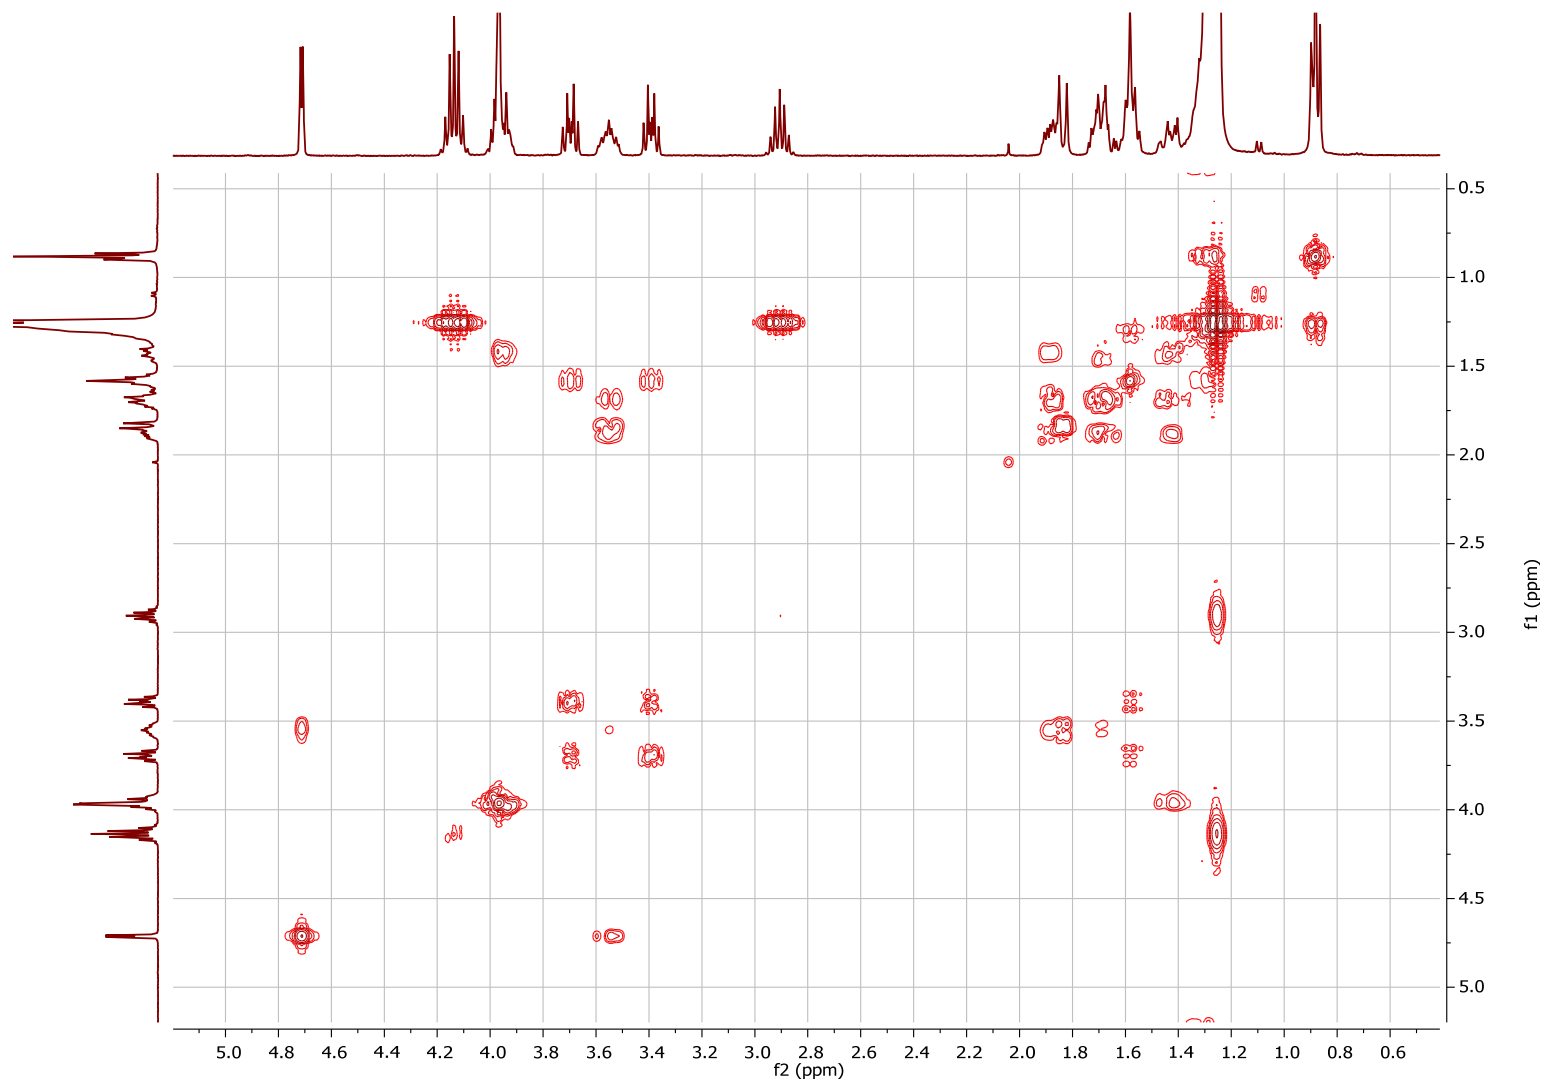

HSQC spectrum (CDCl<sub>3</sub>) of Octyl 3,4-dideoxy-6-*O*-trisyl- $\alpha$ -D-erythro-hexopyranoside (9)

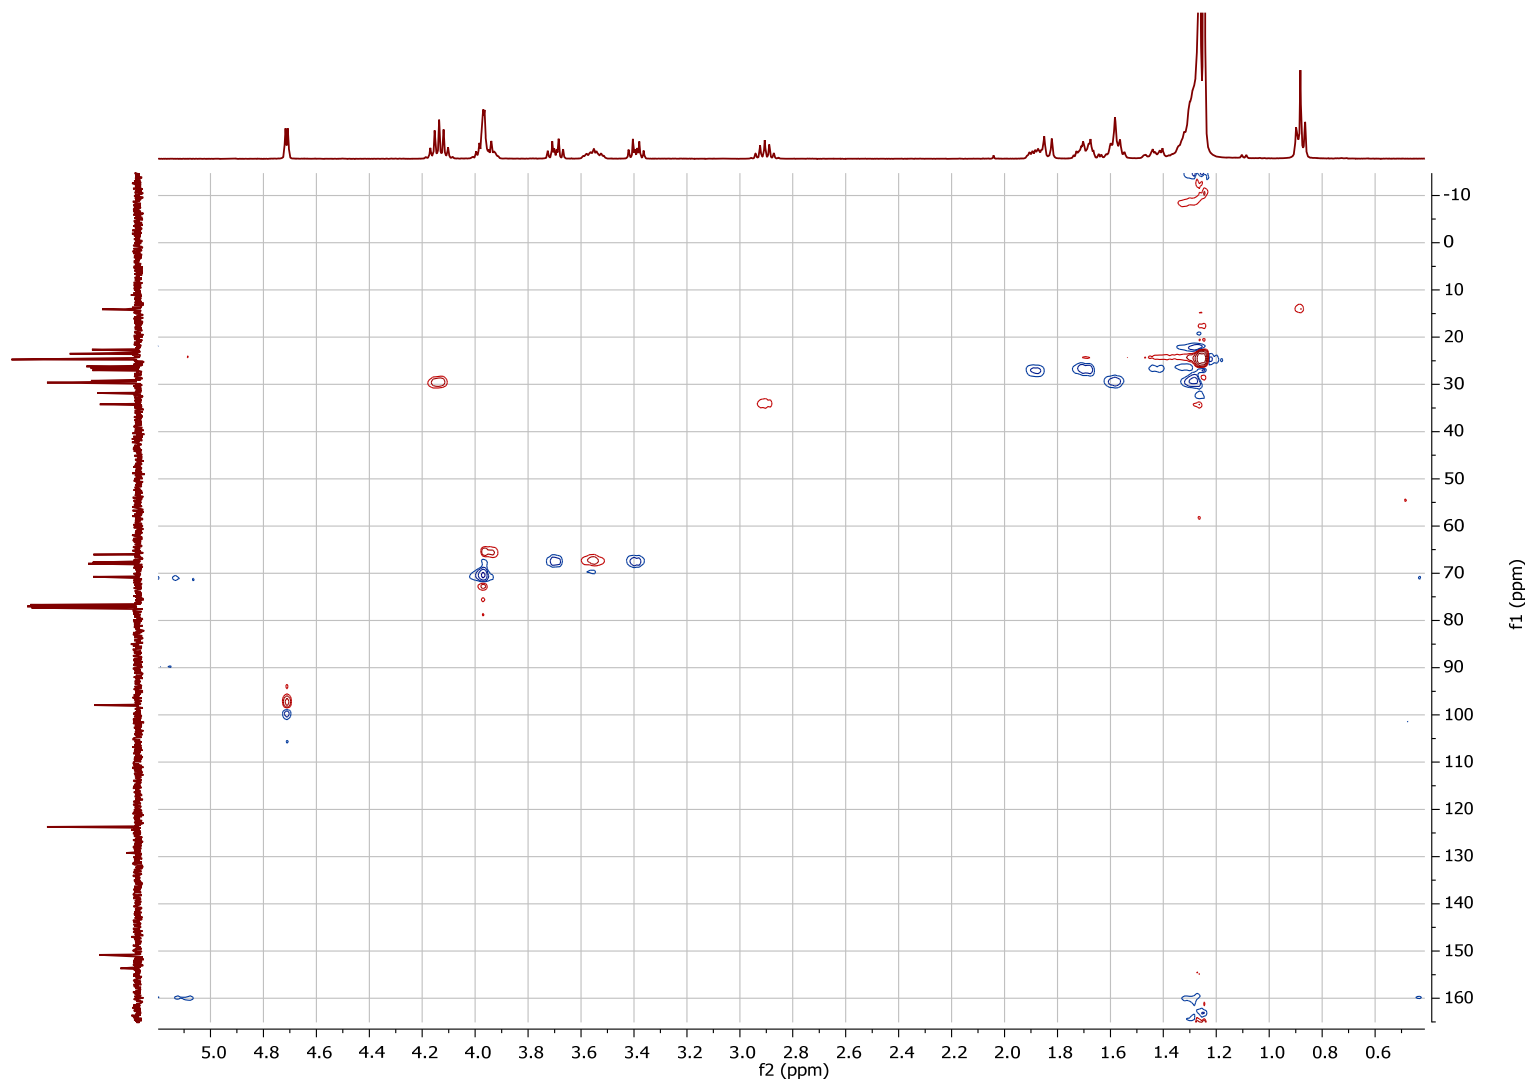

**<sup>1</sup>H NMR (400 MHz, CDCl<sub>3</sub>) of Octyl 2-*O*-benzyl-3,4-dideoxy-6-*O*-trisyl- $\alpha$ -D-erythro-hexopyranoside (10)**

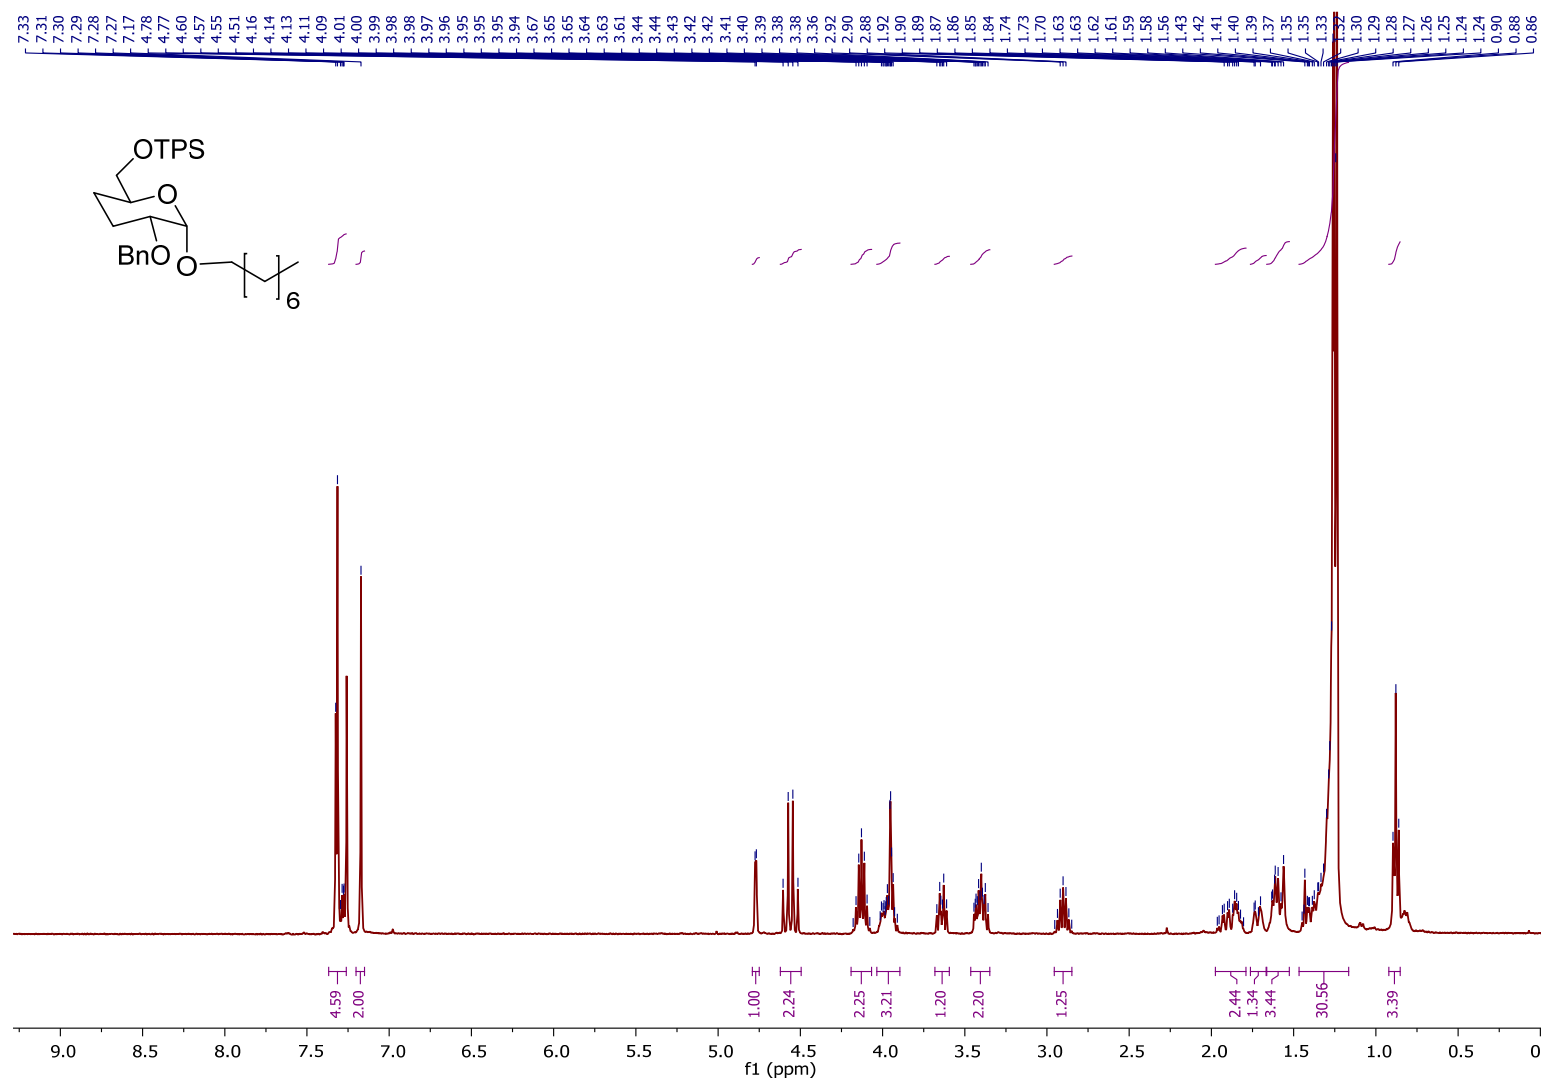

**$^{13}\text{C}\{^1\text{H}\}$  NMR (100 MHz,  $\text{CDCl}_3$ ) of Octyl 2-*O*-benzyl-3,4-dideoxy-6-*O*-trisyl- $\alpha$ -D-erythro-hexopyranoside (10)**

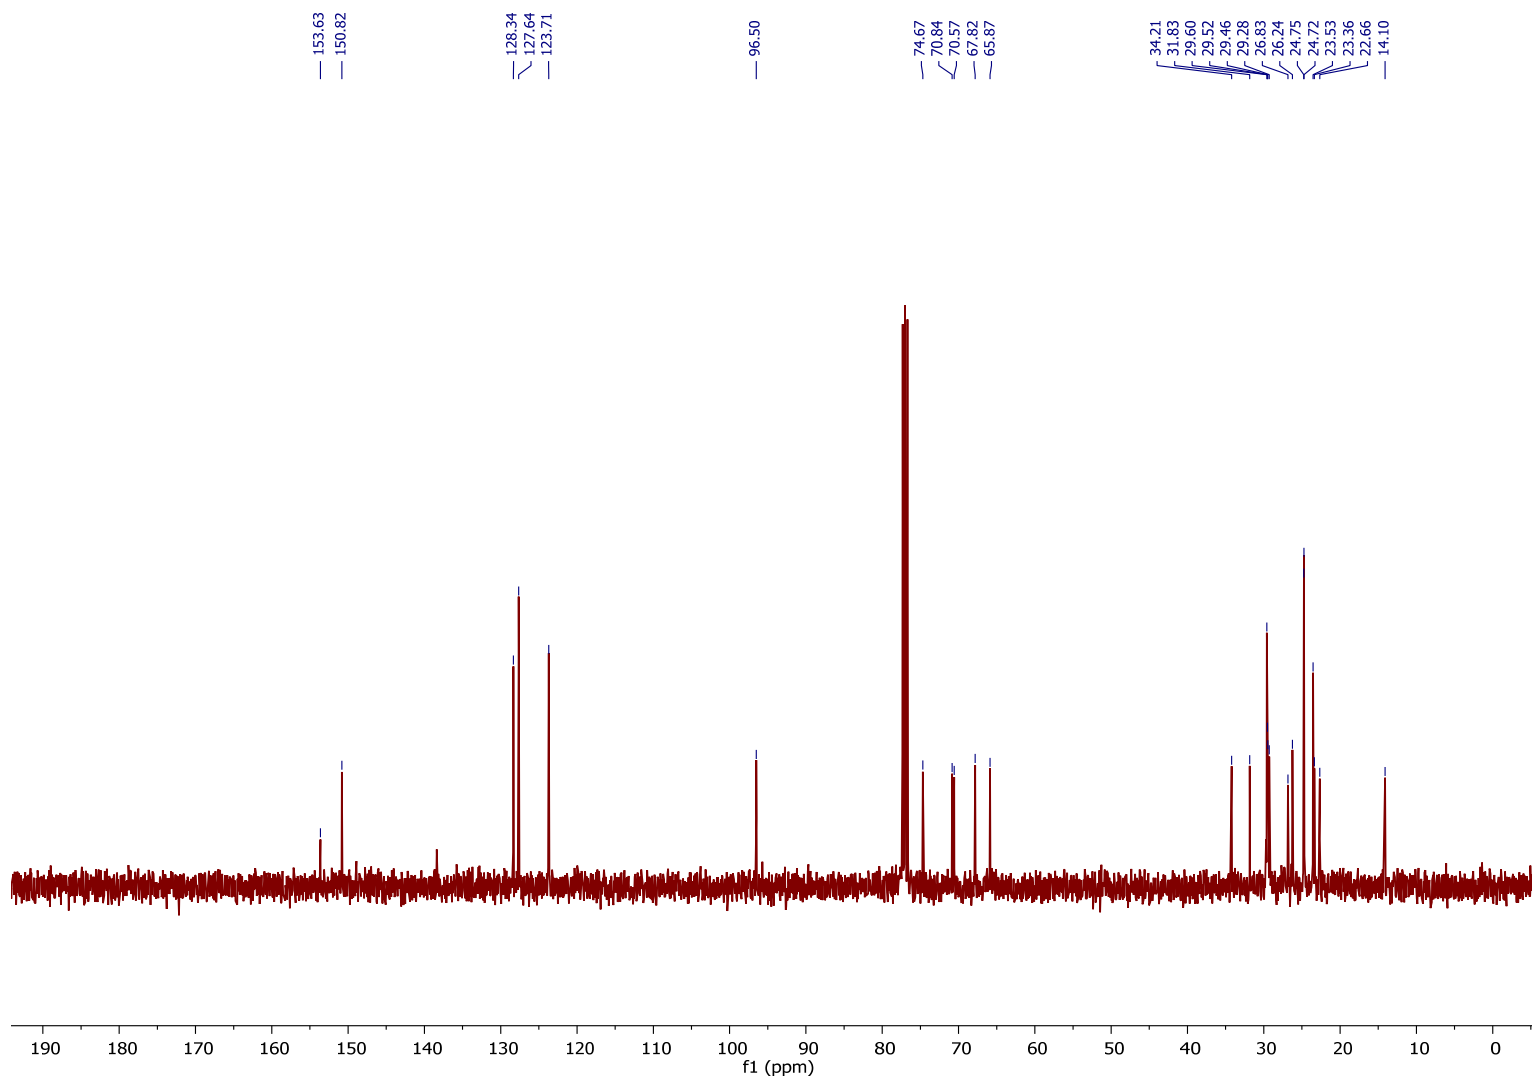



HSQC spectrum (CDCl<sub>3</sub>) of Octyl 2-*O*-benzyl-3,4-dideoxy-6-*O*-trisyl- $\alpha$ -D-erythro-hexopyranoside (10)

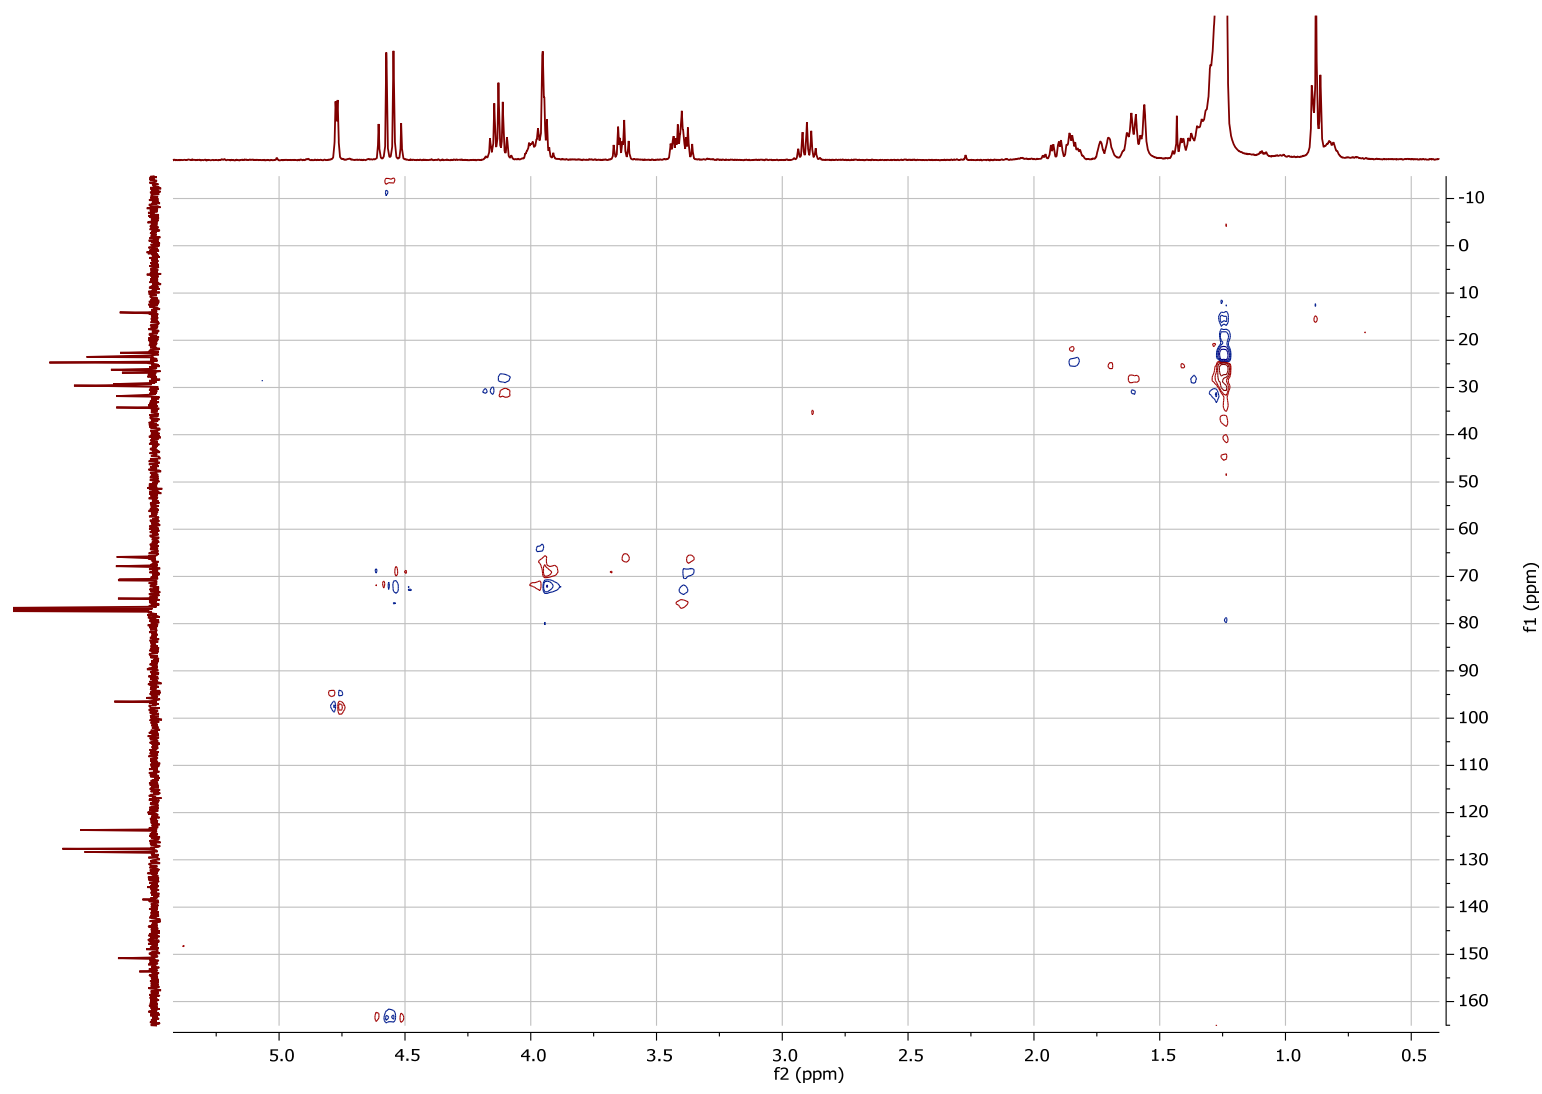

**<sup>1</sup>H NMR (400 MHz, CDCl<sub>3</sub>) of 2-*O*-Benzyl-3,4-dideoxy-6-*O*-trisyl- $\alpha,\beta$ -D-erythro-hexopyranose (11)**

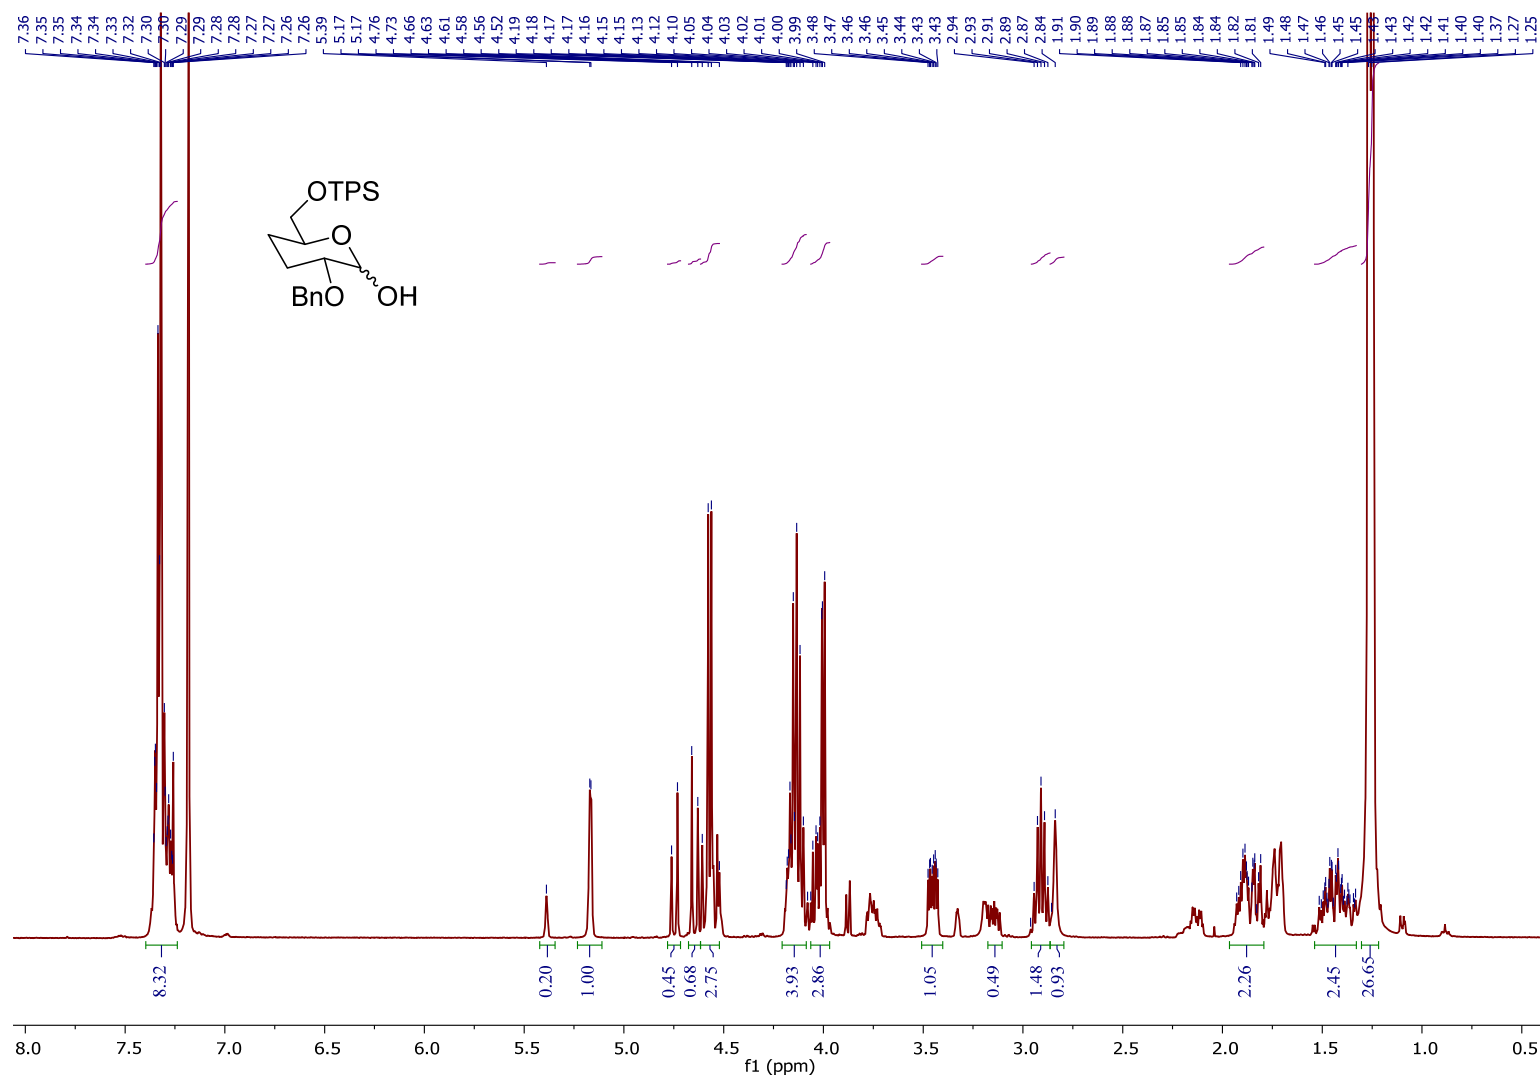

$^{13}\text{C}\{^1\text{H}\}$  NMR (100 MHz,  $\text{CDCl}_3$ ) of 2-*O*-Benzyl-3,4-dideoxy-6-*O*-trisyl- $\alpha,\beta$ -D-erythro-hexopyranose (11)

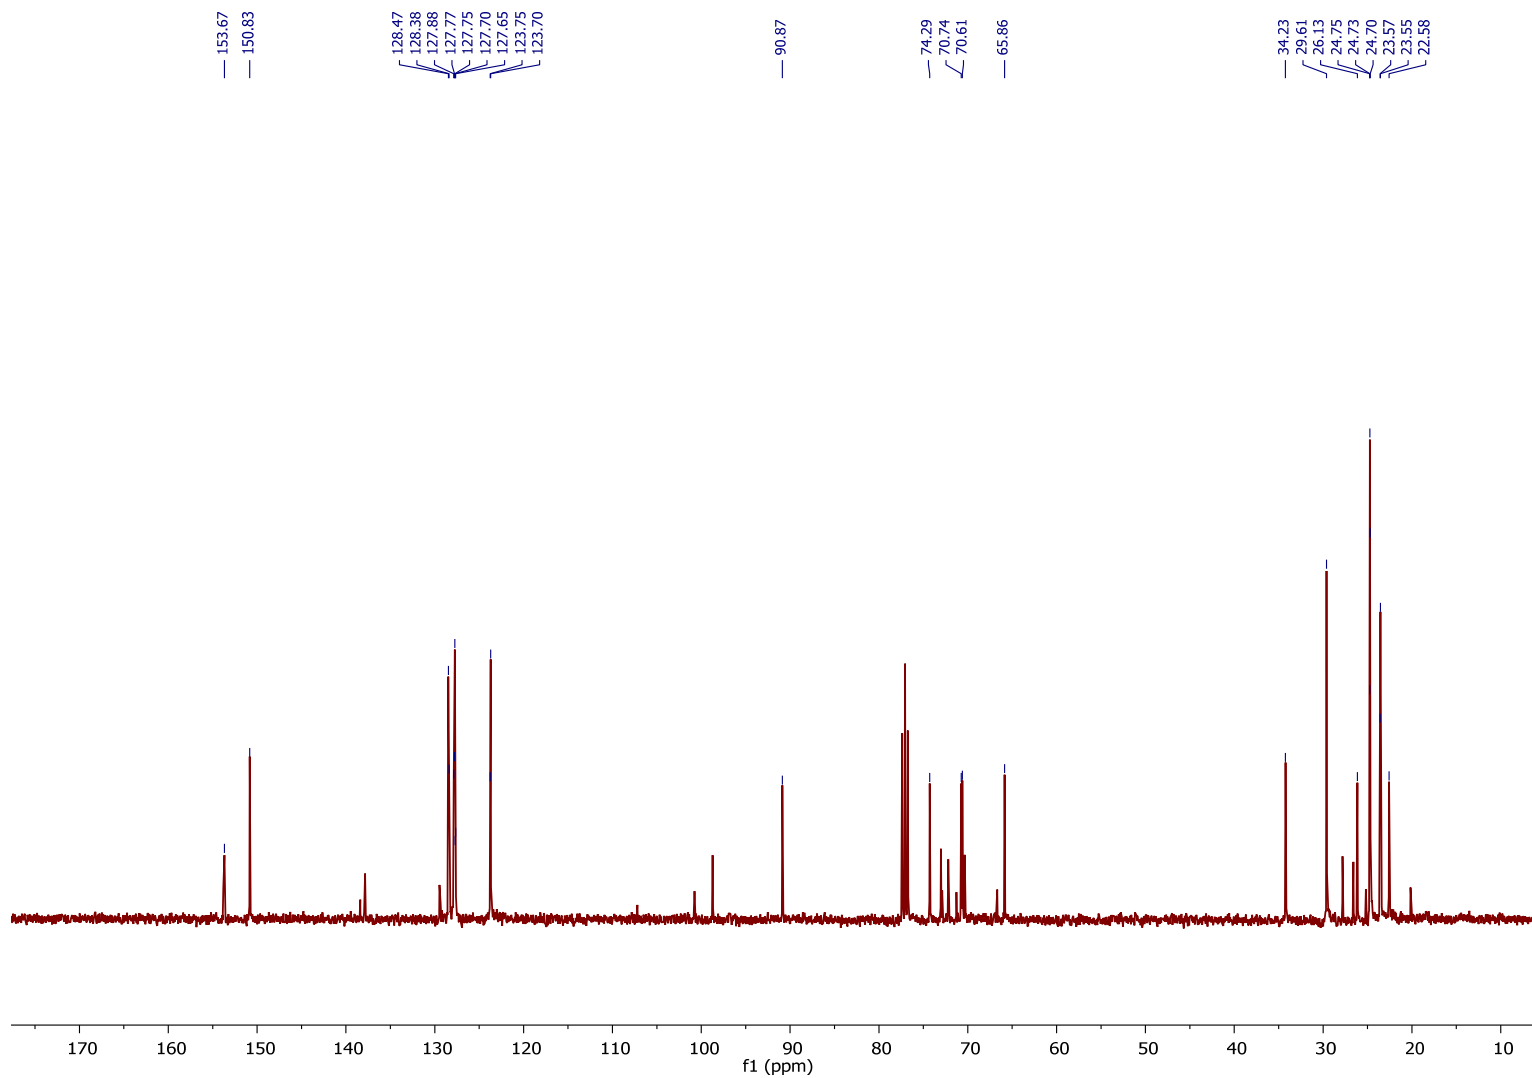



COSY spectrum (CDCl<sub>3</sub>) of 2-*O*-Benzyl-3,4-dideoxy-6-*O*-trisyl- $\alpha,\beta$ -D-erythro-hexopyranose (11)

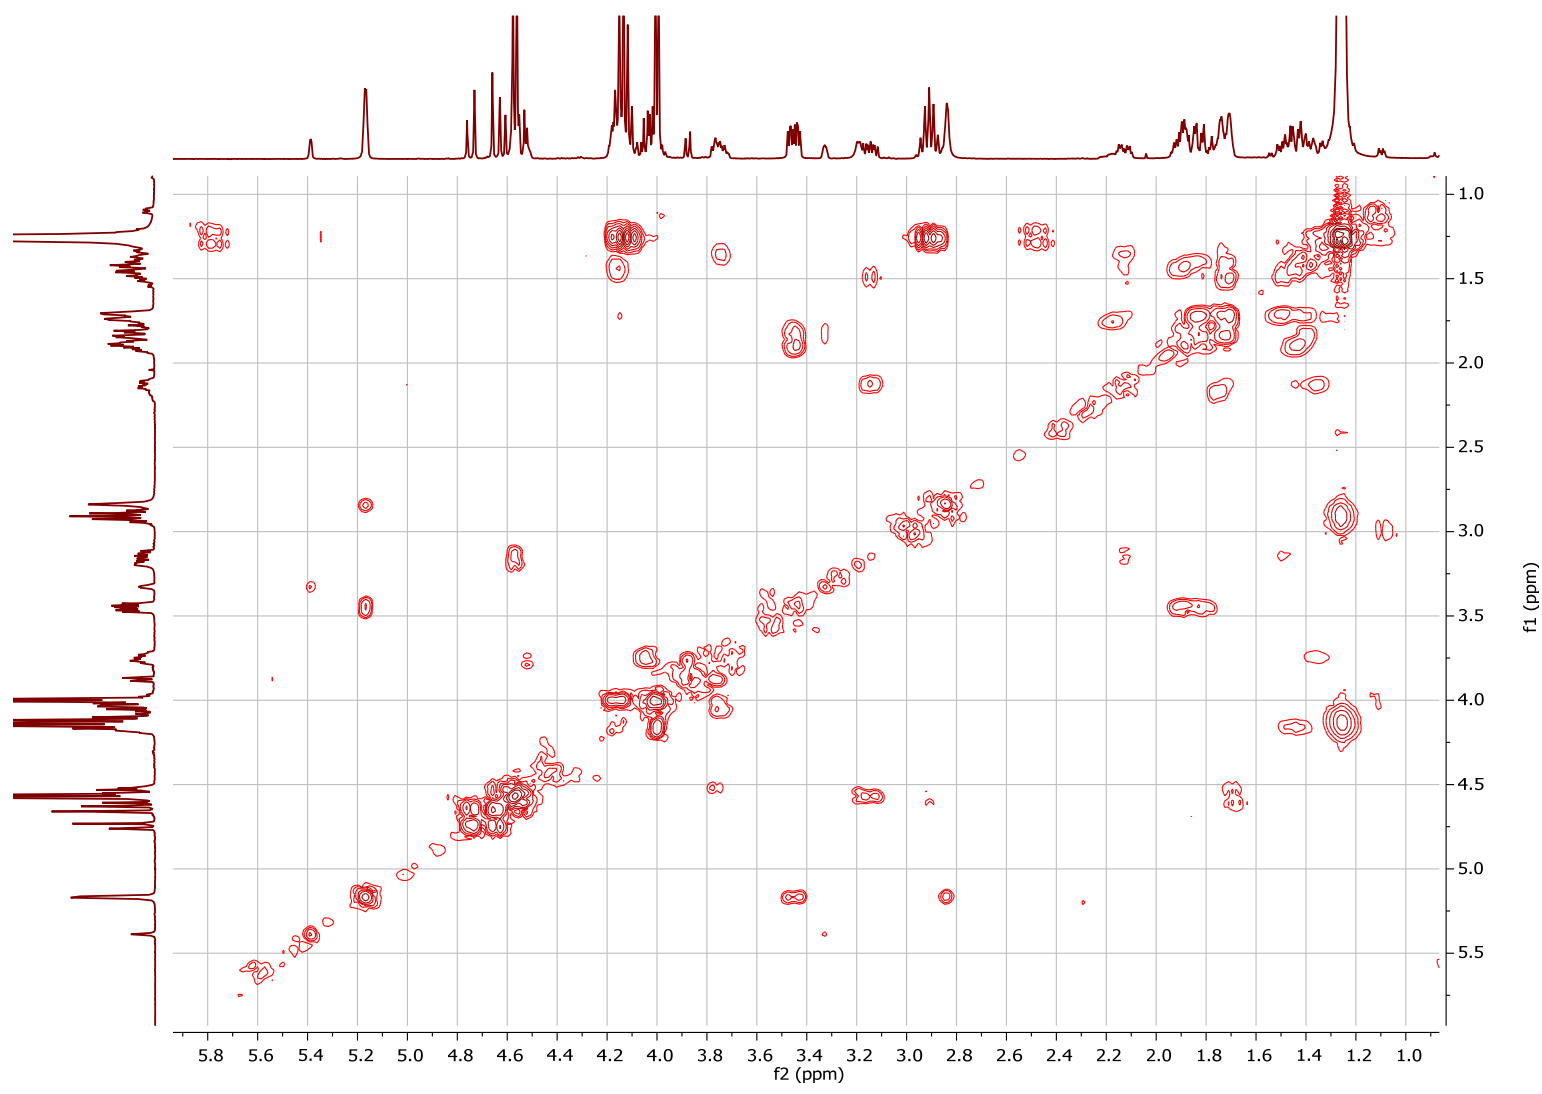

HSQC spectrum (CDCl<sub>3</sub>) of 2-*O*-Benzyl-3,4-dideoxy-6-*O*-trisyl- $\alpha,\beta$ -D-erythro-hexopyranose (11)

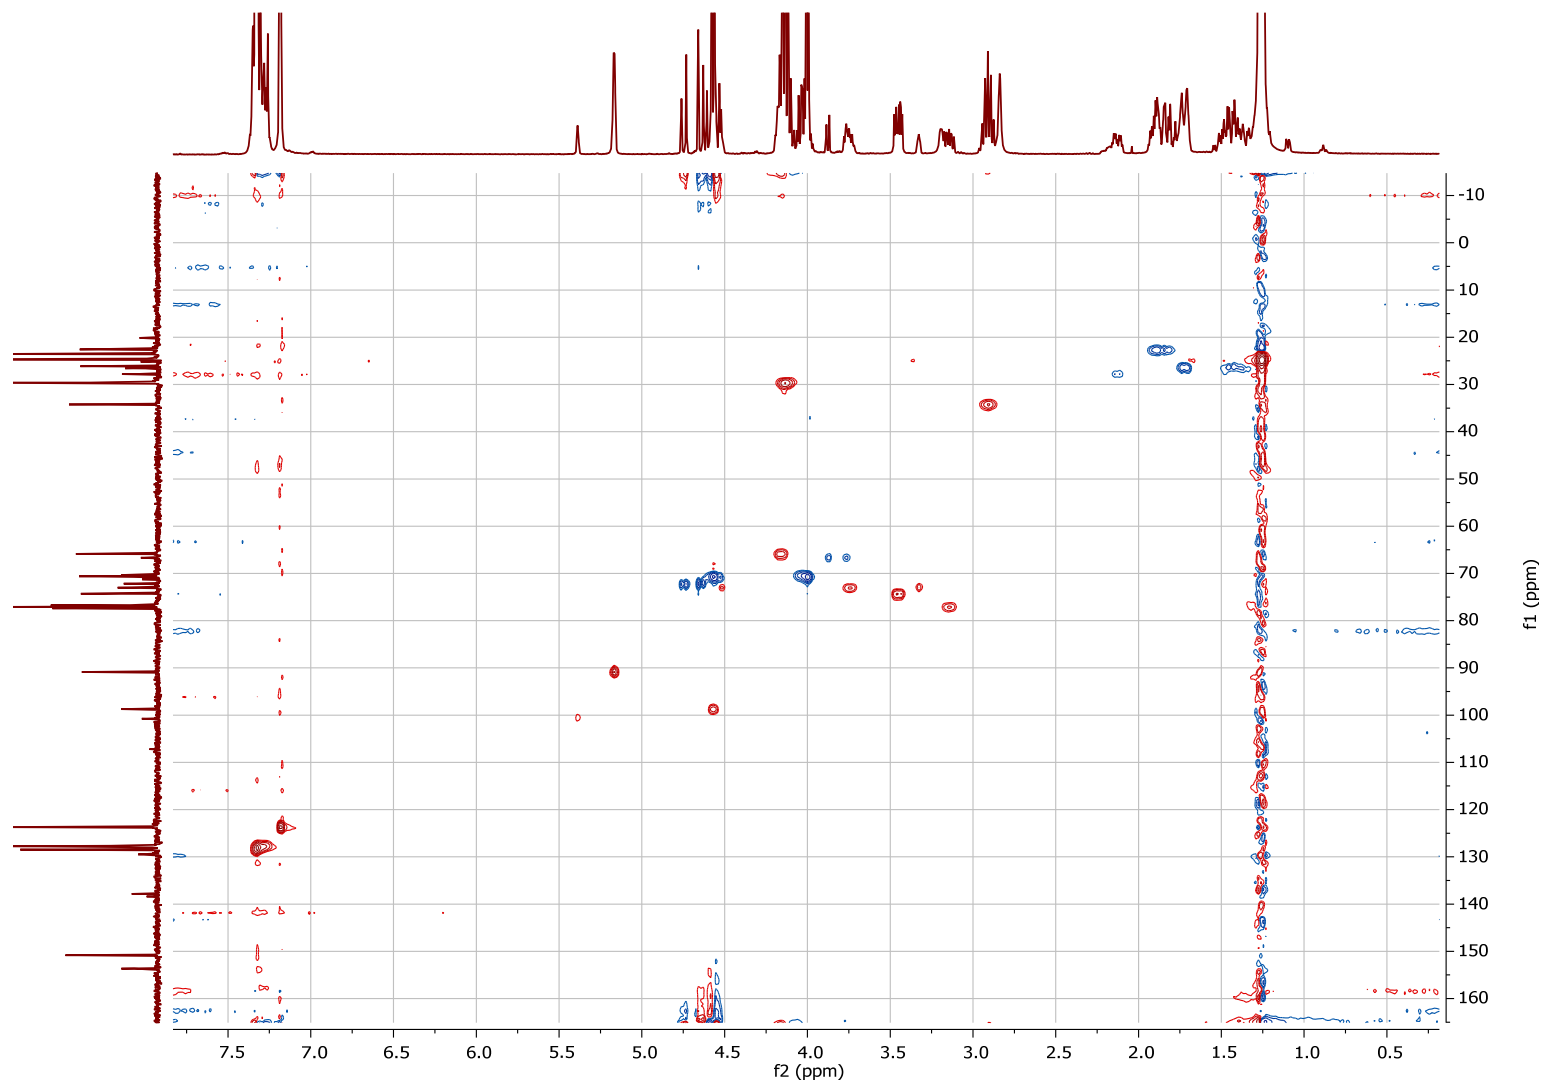

**<sup>1</sup>H NMR (600 MHz, CDCl<sub>3</sub>) of 1,3,2''',6'''-Tetraazido-6,2'',5'',3''',4'''-penta-*O*-benzyl-1,3,2',2''',6'''-pentadeamino-2'-benzyloxy-3',4'-dideoxy-6'-*O*-trisyl paromomycin (12)**

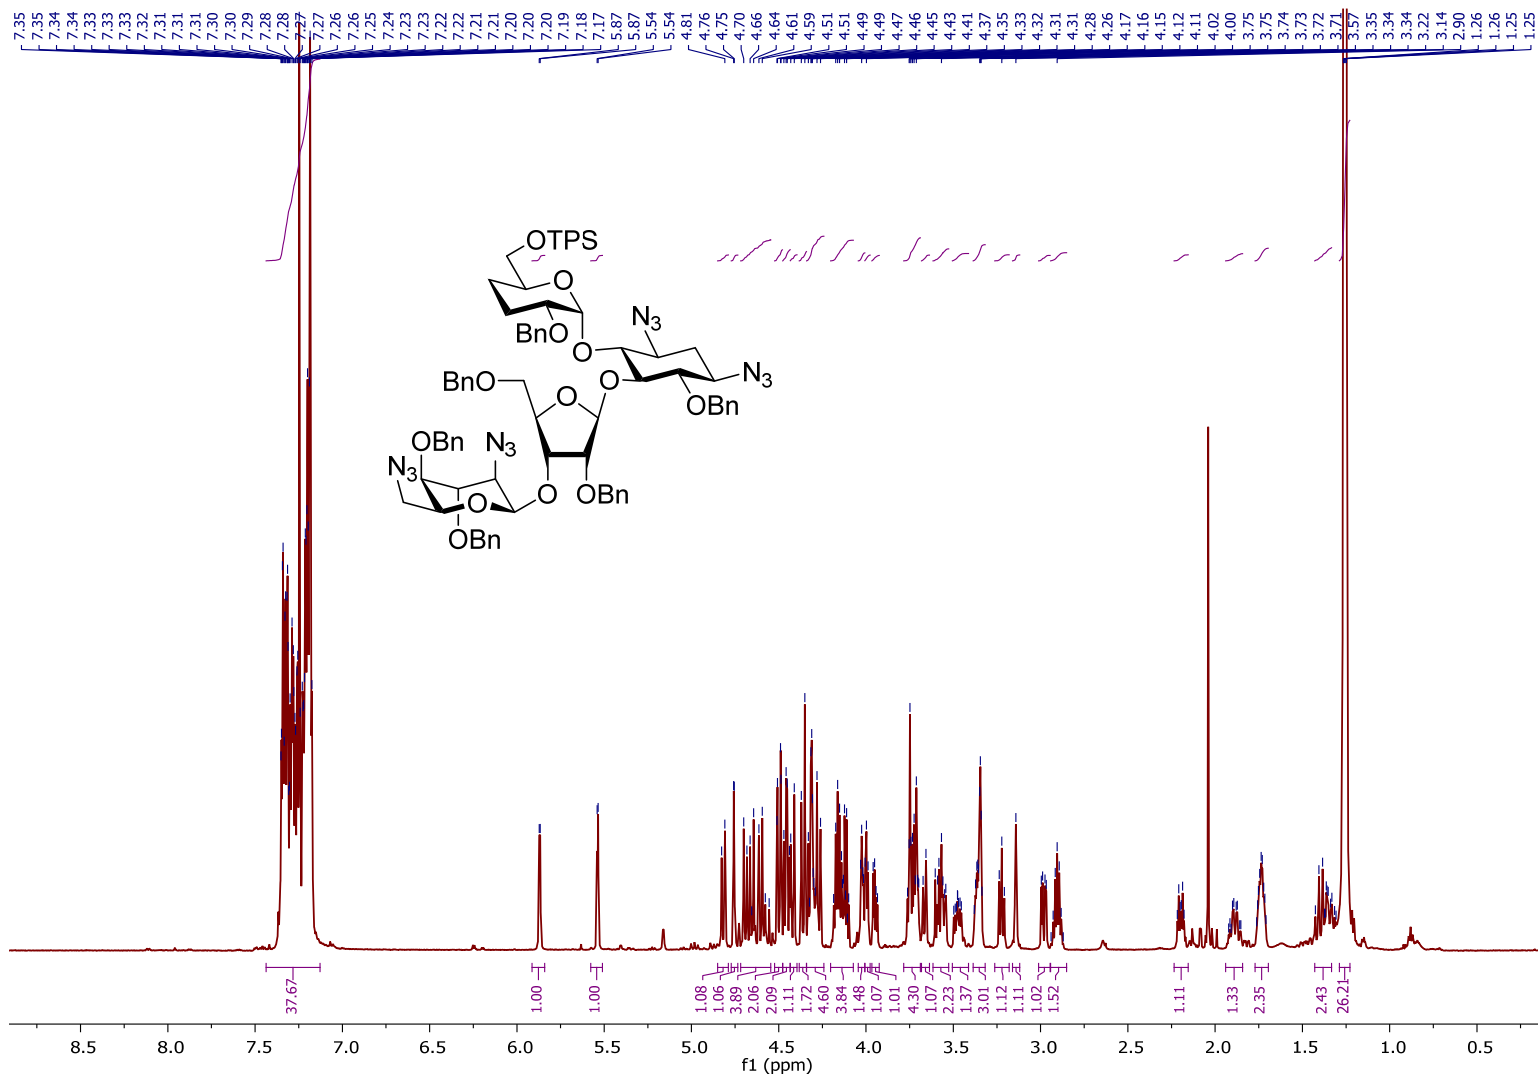

**$^{13}\text{C}\{^1\text{H}\}$  NMR (151 MHz,  $\text{CDCl}_3$ ) of 1,3,2''',6'''-Tetraazido-6,2'',5'',3''',4'''-penta-*O*-benzyl-1,3,2',2''',6'''-pentadeamino-2'-benzyloxy-3',4'-dideoxy-6'-*O*-trisyl paromomycin (12)**

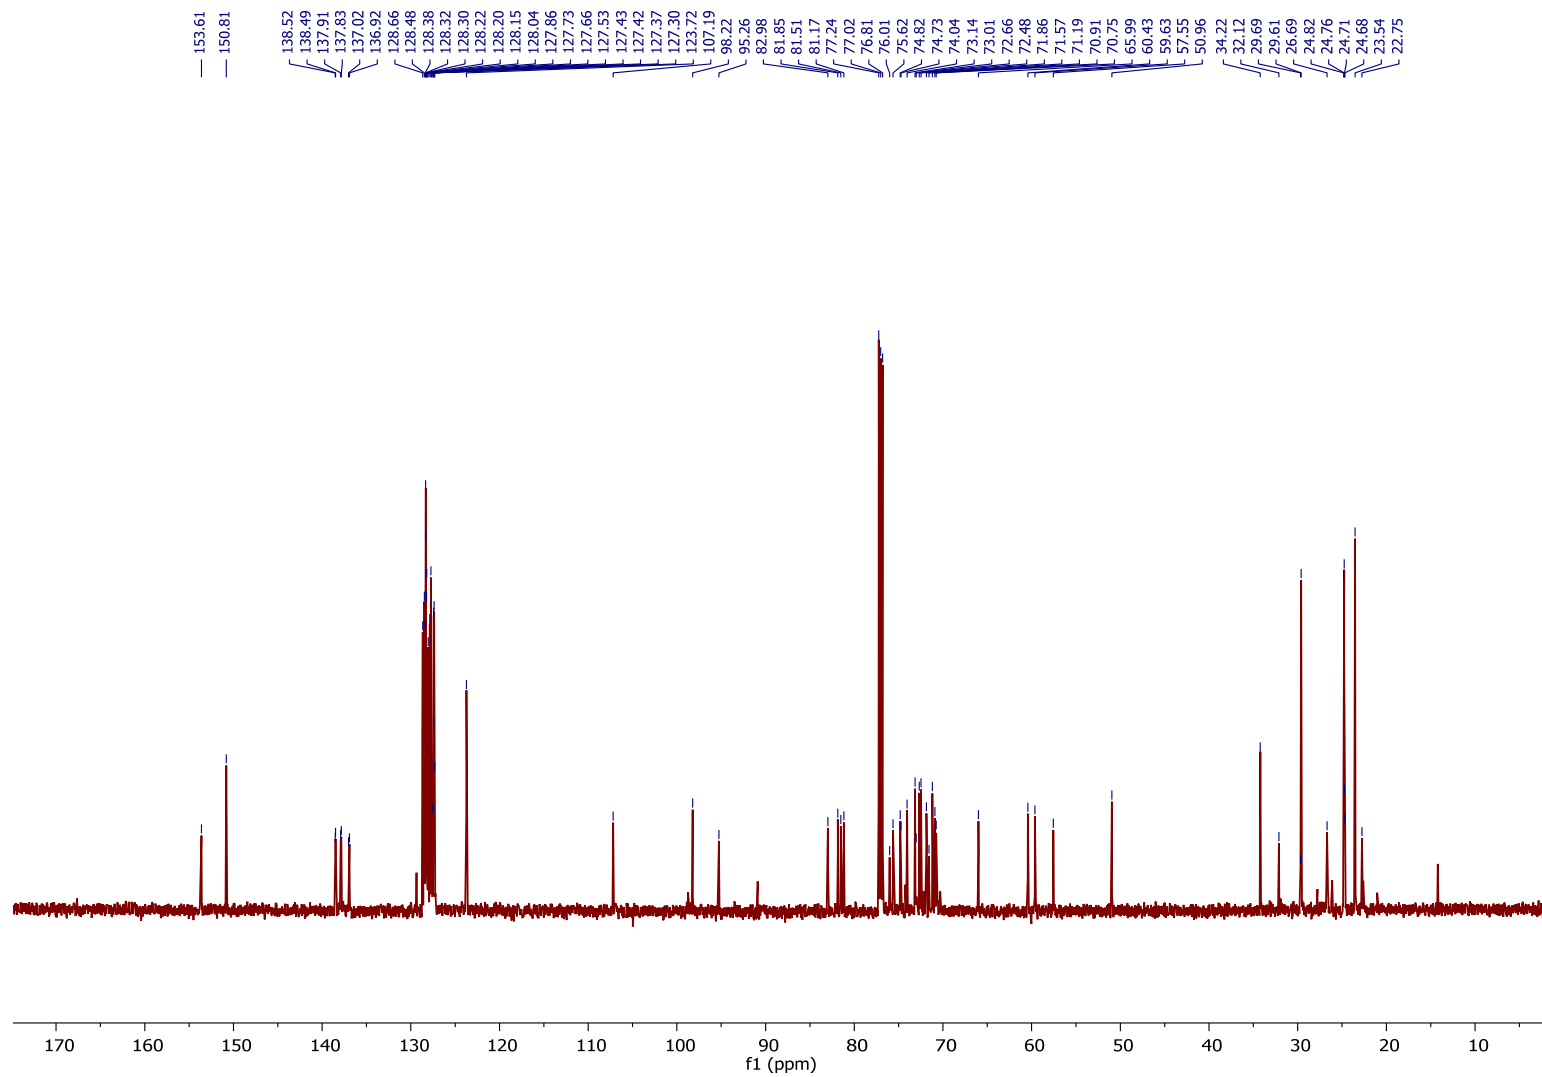

**COSY spectrum (CDCl<sub>3</sub>) of 1,3,2''',6'''-Tetraazido-6,2'',5'',3''',4'''-penta-*O*-benzyl-1,3,2',2''',6'''-pentadeamino-2'-benzyloxy-3',4'-dideoxy-6'-*O*-trisyl paromomycin (12)**

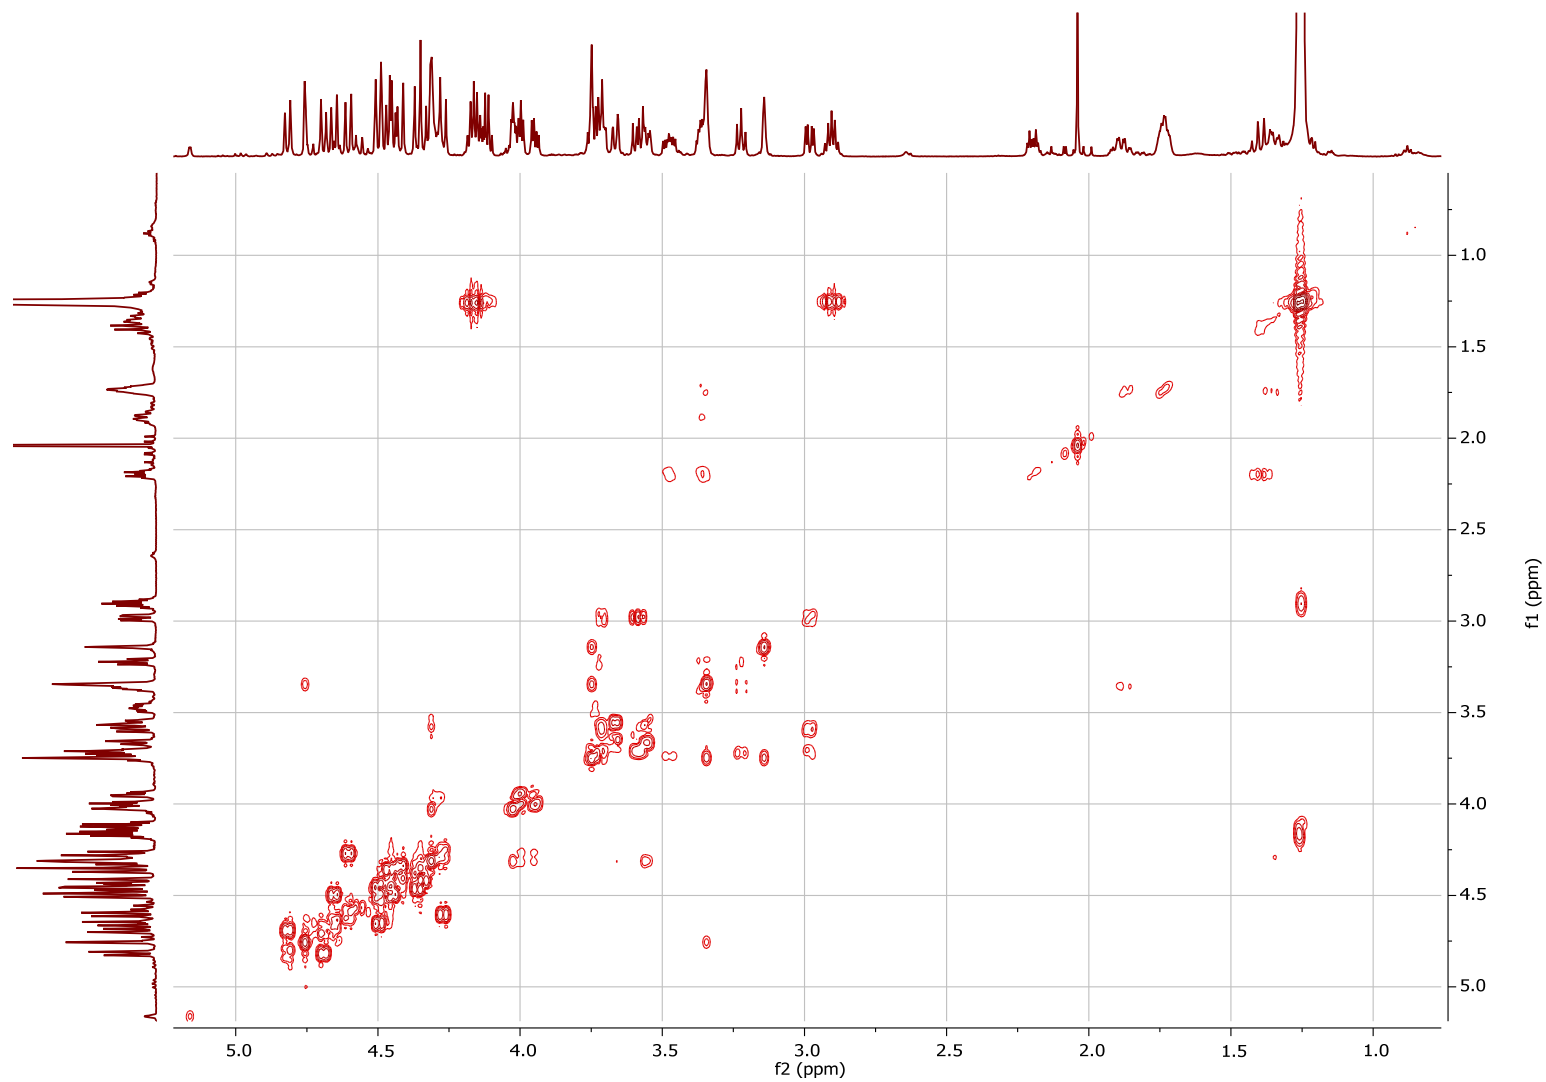

HSQC spectrum (CDCl<sub>3</sub>) of 1,3,2''',6'''-Tetraazido-6,2'',5'',3''',4'''-penta-*O*-benzyl-1,3,2',2''',6'''-pentadeamino-2'-benzyloxy-3',4'-dideoxy-6'-*O*-trisyl paromomycin (12)

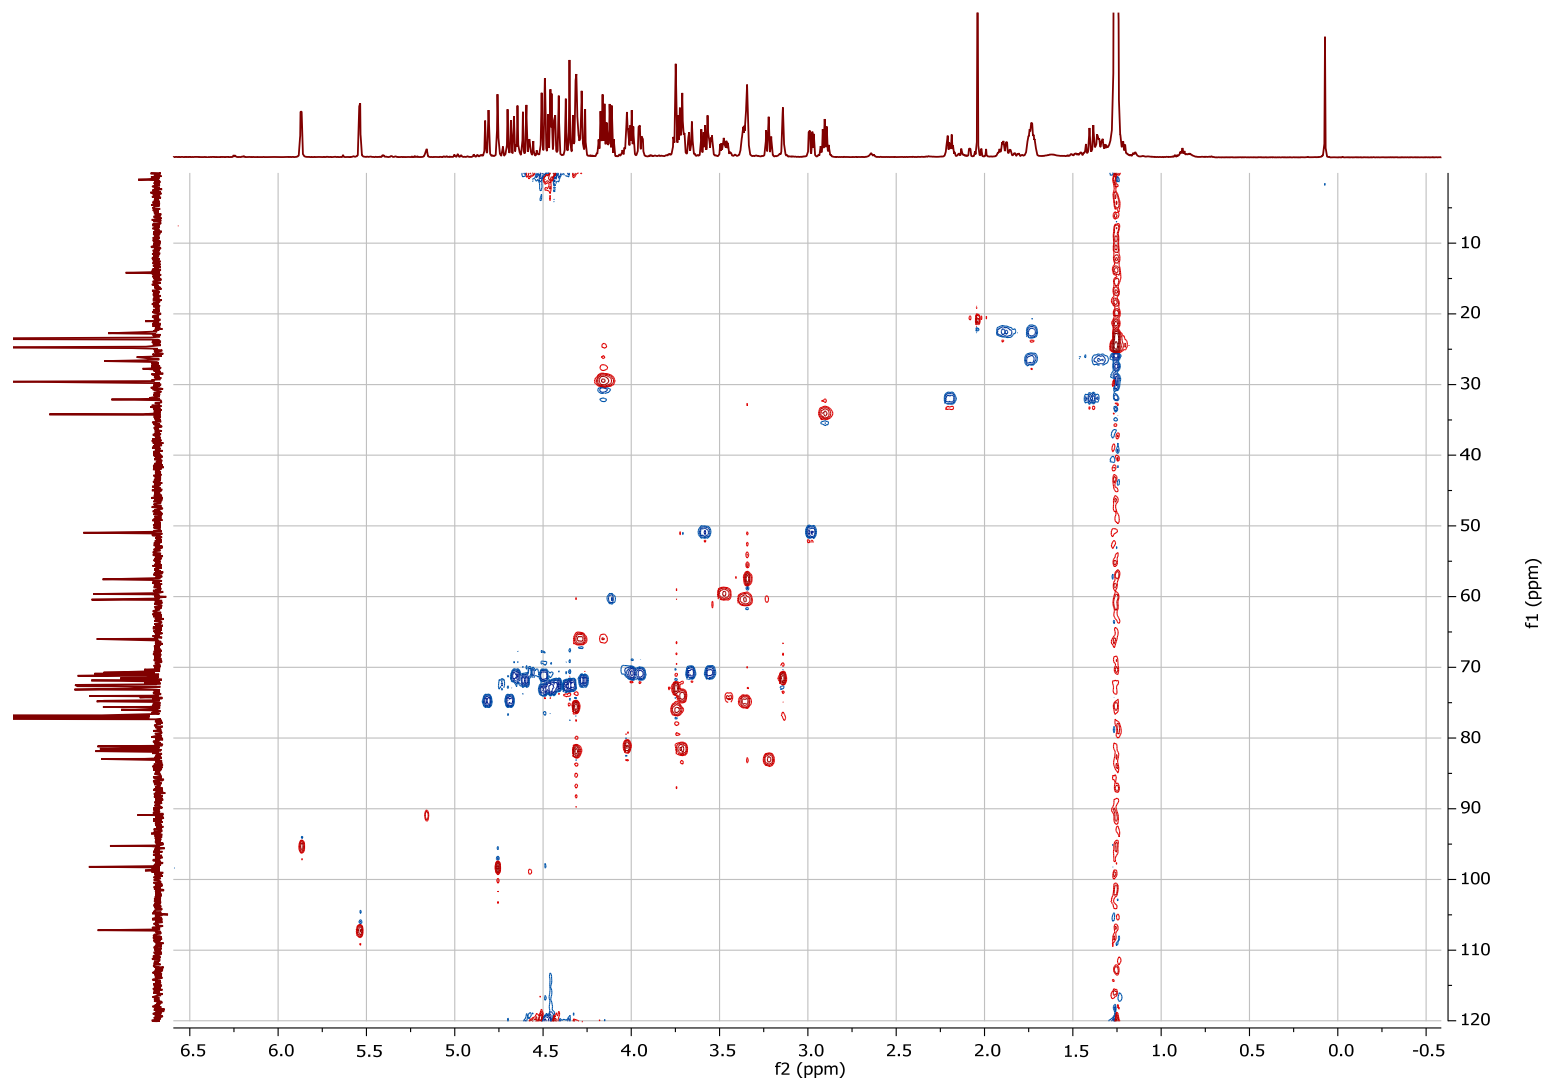

Supplement: NIHMS1592446-supplement-SI.pdf [file NIHMS1592446-supplement-SI.pdf]
